1  
2  
3  
4  
5  
6  
7  
8  
9  
10  
11  
12  
13  
14  
15  
16  
17  
18  
19  
20  
21  
22  
23  
24  
25  
26  
27  
28  
29  
30  
31

Two forms of Opa1 cooperate to complete fusion of the mitochondrial inner-membrane

Yifan Ge <sup>1</sup>, Xiaojun Shi <sup>2,#</sup>, Sivakumar Boopathy <sup>1</sup>, Julie McDonald <sup>1</sup>,  
Adam W. Smith <sup>2</sup>, and Luke H. Chao <sup>1,\*</sup>

<sup>1</sup> Dept. of Molecular Biology - Massachusetts General Hospital; Dept. of Genetics - Harvard Medical School, Boston, MA U.S.A.

<sup>2</sup> Dept. of Chemistry - University of Akron, Ohio U.S.A.

\* Corresponding Author

# Present Address: Rammelkamp Center for Research and Department of Medicine, Departments of Medicine, MetroHealth System; Department of Physiology and Biophysics, School of Medicine, Case Western Reserve University, Ohio U.S.A.

32 **Abstract**

33

34 Mitochondrial membrane dynamics is a cellular rheostat that relates metabolic function and  
35 organelle morphology. Using an *in vitro* reconstitution system, we describe a mechanism for how  
36 mitochondrial inner-membrane fusion is regulated by the ratio of two forms of Opa1. We found  
37 that the long-form of Opa1 (l-Opa1) is sufficient for membrane docking, hemifusion and low levels  
38 of content release. However, stoichiometric levels of the processed, short form of Opa1 (s-Opa1)  
39 work together with l-Opa1 to mediate efficient and fast membrane pore opening. Additionally, we  
40 found that excess levels of s-Opa1 inhibit fusion activity, as seen under conditions of altered  
41 proteostasis. These observations describe a mechanism for gating membrane fusion.

42

43

44 **Introduction**

45

46 Mitochondrial membrane fission and fusion is essential for generating a dynamic mitochondrial  
47 network and regenerative partitioning of damaged components via mitophagy (1). Membrane  
48 rearrangement is essential for organelle function (2, 3) and contributes to diversity in  
49 mitochondrial membrane shape that can reflect metabolic and physiological specialization (4-6).

50

51 Mitochondrial membrane fusion in metazoans is catalyzed by the mitofusins (Mfn1/2) and Opa1  
52 (the outer and inner membrane fusogens, respectively), which are members of the dynamin family  
53 of large GTPases (7, 8) (**Figure 1A**). An important series of *in vitro* studies with purified  
54 mitochondria showed that outer- and inner membrane fusion can be functionally decoupled (9,  
55 10). Outer membrane fusion requires the Mfn1/2, while inner-membrane fusion requires Opa1.  
56 Loss of Opa1 function results in a fragmented mitochondrial network, loss of mitochondrial DNA,  
57 and loss of respiratory function (11, 12). Opa1 is the most commonly mutated gene in Dominant  
58 Optic Atrophy, a devastating pediatric condition resulting in degeneration of retinal ganglion cells.  
59 Mutations in Opa1 account for over a third of the identified cases of this form of childhood  
60 blindness (13).

61

62 Like dynamin, Opa1 comprises a GTPase domain, helical bundle signaling element (BSE), and  
63 stalk region (with a membrane-interaction insertion) (**Figure 1B**) (14-16). A recent crystal  
64 structure of the yeast orthologue of Opa1, Mgm1, revealed this membrane-interaction insertion is  
65 a ‘paddle’, which contains a series of hydrophobic residues that can dip into one leaflet of a  
66 membrane bilayer (17).

67  
68 Opa1 is unique for a dynamin family GTPase, because it is processed to generate two forms. The  
69 unprocessed, N-terminal transmembrane anchored, long form is called l-Opa1. The proteolytically  
70 processed short form, which lacks the transmembrane anchor, is called s-Opa1 (18). Opa1 is  
71 processed by two proteases in a region N-terminal to the GTPase domain. Opa1 activity is  
72 stimulated by membrane depolarization (19). Yme1L activity is coupled to respiratory state. Both  
73 forms of the protein (s-Opa1 and l-Opa1) can interact with cardiolipin, a negatively charged lipid  
74 enriched in the mitochondrial inner membrane. Opa1 GTPase activity is stimulated by association  
75 with cardiolipin (20).

76  
77 Recent structural studies of Mgm1 focused on a short form, s-Mgm1 construct (16). This analysis  
78 revealed a series of self-assembly interfaces in Mgm1’s stalk region. One set of interactions  
79 mediates a crystallographic dimer, and a second set, observed in both the crystal and cryo-electron  
80 tomographic (cryo-ET) reconstructions, bridge dimers in helical arrays on membrane tubes with  
81 both positive and negative curvature. The s-Mgm1 membrane tubes that formed with negative  
82 curvature are especially intriguing, because of Opa1’s recognized role in cristae regulation, and  
83 the correspondence of the *in vitro* tube topology with cristae inner-membrane invaginations (9,  
84 21). These self-assembled states were not mediated by GTPase-domain dimers.

85  
86 Integrative biophysical and structural insights have revealed how dynamin nucleotide-state is  
87 coupled to GTPase-domain dimerization, stalk-mediated self-assembly and membrane  
88 rearrangement (17, 22-24). For Opa1, the opposite reaction (fusion) is also likely to result from  
89 nucleotide-dependent conformational changes, coupled domain rearrangement, and self-assembly  
90 necessary to overcome the kinetic barriers of membrane merger. Recent crystal structure and  
91 electron cryo-tomography reconstructions reveal self-assembly interfaces, and conformational

92 changes that rearrange cristae membranes (16). The specific fusogenic nucleotide hydrolysis-  
93 driven conformational changes remain to be distinguished.

94

95 Classic studies of Mgm1, the yeast orthologue of Opa1, show that both long and short forms are  
96 required for inner-membrane fusion (25, 26). Studies by David Chan's group, using mammalian  
97 cells, also showed that both long and short forms of Opa1 are required (27), and that knock-down  
98 of the Opa1 processing protease Yme1L results in a more fragmented mitochondrial network (18).  
99 Since Yme1L activity is tied to respiratory state, supplying cells with substrates for oxidative  
100 phosphorylation shifts the mitochondrial network to a more tubular state. These observations led  
101 the Chan group to conclude that Opa1 processing is important for fusion. In contrast, work from  
102 the Langer group showed l-Opa1 alone was sufficient for fusion when expressed in a YME1L *-/-*,  
103 OMA1 *-/-* background (6), indicating that Opa1 processing is dispensable for fusion. Over-  
104 expression of s-Opa1 in this background resulted in mitochondrial fragmentation, which was  
105 interpreted as a result of s-Opa1 mediated fission. These directly conflicting interpretations of  
106 cellular observations have remained unreconciled. Is proteolytic processing of Opa1 required for  
107 regulating fusion, and if so, is the processing stimulatory or inhibitory?

108

109 In this study, we applied a TIRF-based supported bilayer/liposome assay (**Figure 1C**), to  
110 distinguish the sequential steps in membrane fusion that convert two apposed membranes into one  
111 continuous bilayer: tethering, membrane docking, lipid mixing (hemifusion) and content release  
112 (**Figure 1D**). This format allows control of protein levels for all components introduced into the  
113 system. Previous *in vitro* reconstitution studies from Ishihara and colleagues (28) were performed  
114 in bulk. The analysis we present here resolves individual fusion events in the TIRF field and is  
115 more sensitive than bulk measurements. In addition, our assay records kinetic data lost in ensemble  
116 averaging. Finally, the assay as applied here, can distinguish stages of fusion for individual  
117 liposomes. Tethering is observed when liposomes attach to the supported bilayer. Lipid mixing  
118 (hemifusion) is reported when a liposome dye (TexasRed) diffuses into the supported bilayer.  
119 Release of a soluble content dye (calcein) from within the liposome (loaded at quenched  
120 concentrations) indicates full pore opening. Our assay includes a content reporter dye in all  
121 conditions, so we can relate each intermediate with full fusion, for example, comparing instances  
122 where there may be lipid mixing, but no content release.

123

124 Using this *in vitro* reconstitution approach, we describe key mechanistic requirements for  
125 mitochondrial inner-membrane fusion. We report efficiency and kinetics for each step in Opa1-  
126 mediated fusion. These experiments describe the membrane activities of l-Opa1 alone, s-Opa1  
127 alone, and l-Opa1:s-Opa1 together. We find that s-Opa1 and l-Opa1 are both required for efficient  
128 and fast pore opening, and present a mechanism for how the ratio of l-Opa1 and s-Opa1 levels  
129 regulate inner-membrane fusion. These results are compatible and expand the original yeast  
130 observations (25), explain previous cellular studies (6, 18), and contextualizes recent *in vitro*  
131 observations (28). The data presented here unambiguously describe the activities of Opa1,  
132 contributing to a more complete model for how inner-membrane fusion is regulated.

133

## 134 **Results**

135

### 136 **Assay validation**

137 We purified long and short forms of human Opa1 expressed in *Pichia pastoris*. Briefly, Opa1 was  
138 extracted from membranes using n-dodecyl- $\beta$ -D-maltopyranoside (DDM) and purified by Ni-NTA  
139 and Strep-tactin affinity chromatography, and size exclusion chromatography (**Figure 2A**). A  
140 series of short isoforms are observed *in vivo* (11, 29). In this study, we focused on a short form  
141 corresponding to the S1 isoform resulting from Oma1 cleavage (**Figure 2B**). GTPase activity of  
142 purified Opa1 was confirmed by monitoring free phosphate release (**Figure 2C & D**). Opa1  
143 activity was enhanced by the presence of cardiolipin, consistent with previous reports (**Figure 2C**  
144 **& D, Figure 2-figure supplement 1**) (20).

145

146 We reconstituted l-Opa1 into 200 nm liposomes and supported bilayers generated by Langmuir-  
147 Blodgett/Langmuir-Schaefer methods (30). l-Opa1 was added to liposomes and a supported  
148 bilayer at an estimated protein:lipid molar ratio of 1:5000 and 1:50000, respectively. Membranes  
149 comprised DOPE (20%), Cardiolipin (20%), PI (7%), and DOPC (52.8%). Reporter dyes (e.g.  
150 Cy5-PE, TexasRed-PE) were introduced into the supported bilayer and liposome membranes,  
151 respectively, at ~0.2 % (mol). A surfactant mixture stabilized the protein sample during  
152 incorporation. Excess detergent was removed using Bio-Beads and dialysis. We confirmed  
153 successful reconstitution by testing the stability of l-Opa1 incorporation under high salt and sodium

154 carbonate conditions, and contrasting these results with s-Opa1 peripheral membrane association  
155 (**Figure 2-figure supplement 2**).

156

157 We evaluated reconstitution of l-Opa1 into both the polymer-tethered supported lipid bilayers and  
158 proteoliposomes using two approaches. First, using Fluorescence Correlation Spectroscopy (FCS),  
159 we measured the diffusion of dye-conjugated lipids and antibody-labeled protein. FCS intensity  
160 measurements confirmed ~75% of l-Opa1 reconstituted into the bilayer in the accessible  
161 orientation. Bilayer lipid diffusion was measured as  $1.46 \pm 0.12 \mu\text{m}^2/\text{s}$ , while the diffusion  
162 coefficient of bilayer-reconstituted l-Opa1 was  $0.88 \pm 0.10 \mu\text{m}^2/\text{s}$  (**Figure 2-figure supplement**  
163 **3**), which is in agreement with previous reports of lipid and reconstituted transmembrane protein  
164 diffusion (31). These measurements indicate the reconstituted l-Opa1 in the bilayer can freely  
165 diffuse, and has the potential to self-associate and oligomerize. Blue native polyacrylamide gel  
166 electrophoresis (BN-PAGE) analysis also show the potential for the purified material to self-  
167 assemble (**Figure 2-figure supplement 4**). FCS experiments were also performed on liposomes.  
168 FCS intensity measurements confirmed 86.7% of total introduced l-Opa1 successfully  
169 reconstituted into the liposomes. The diffusion coefficient of free antibody was  $163.87 \pm 22.27$   
170  $\mu\text{m}^2/\text{s}$ . The diffusion coefficient for liposomes labeled with a lipid dye was  $2.22 \pm 0.33 \mu\text{m}^2/\text{s}$ , and  
171 the diffusion coefficient for l-Opa1 proteoliposomes bound to a TexasRed labeled anti-His  
172 antibody was  $2.12 \pm 0.36 \mu\text{m}^2/\text{s}$  (**Figure 2-figure supplement 5**). Second, we measured the  
173 number of l-Opa1 incorporated into liposomes by fluorescent step-bleaching of single  
174 proteoliposomes (**Figure 2E & F**). We found an average step number of 2.7 for individual l-Opa1-  
175 containing proteoliposomes labeled with TexasRed conjugated anti-His antibody, when tethered  
176 to cardiolipin containing lipid bilayers (**Figure 2G**).

177

### 178 **Nucleotide-dependent bilayer tethering and docking**

179 Using the supported bilayer/liposome assay sketched in **Figure 1C**, we found that l-Opa1 tethers  
180 liposomes in a homotypic fashion (**Figure 3A**), as reported by the appearance of TexasRed puncta  
181 in the TIRF field above a l-Opa1-containing bilayer. This interaction occurred in the absence of  
182 nucleotide (apo, nucleotide-free) but was enhanced by GTP. We next investigated requirements  
183 for Opa1 tethering. In the absence of cardiolipin, addition of GTP did not change the number of  
184 tethered particles under otherwise identical conditions (**Figure 3B**). In contrast, with cardiolipin-

185 containing liposomes and bilayers, homotypic l-Opa1:l-Opa1 tethering is enhanced by GTP. Non-  
186 hydrolyzable analogues (GMPPCP) disrupt tethering (**Figure 3C**), and a hydrolysis-dead mutant  
187 (G300E) l-Opa1 shows little tethering (**Figure 3-figure supplement 1B**), supporting a role for the  
188 hydrolysis transition-state in tethering, as observed for atlastin (32, 33). Bulk light scattering  
189 measurements of liposome size distributions (by NTA Nanosight) show l-Opa1-mediated  
190 liposome clustering requires the presence of GTP (**Figure 3-figure supplement 2**). These bulk  
191 measurements show a GTP-dependent increase in observed particle size.

192

193 Ban, Ishihara and colleagues have observed a heterotypic, fusogenic interaction between l-Opa1  
194 on one bilayer and cardiolipin in the opposing bilayer (28). Inspired by this work and our own  
195 observations, we considered if a heterotypic interaction between l-Opa1 and cardiolipin on the  
196 opposing membrane could contribute to l-Opa1-mediated tethering (**Figure 3D**). Indeed, we find  
197 that proteoliposomes containing l-Opa1 will tether to a cardiolipin-containing bilayer lacking any  
198 protein binding partner, presumably mediated by the lipid-binding ‘paddle’ insertion in the helical  
199 stalk region (16). This tethering is cardiolipin-dependent, as l-Opa1 containing bilayers do not  
200 tether DOPC liposomes (**Figure 4-figure supplement 1B**).

201

202 We next measured whether s-Opa1, lacking the transmembrane anchor, could tether membranes  
203 via membrane binding interactions that bridge the two bilayers. We observe that s-Opa1 (added at  
204 a protein:lipid molar ratio of 1:5000) can tether cardiolipin liposomes to a cardiolipin-containing  
205 planar bilayer, as observed previously for Mgm1 (34). Further, this s-Opa1 tethering is enhanced  
206 by the presence of GTP (**Figure 3E**). Previous reports observed membrane tubulation at higher  
207 concentrations of s-Opa1 (0.2 mg/ml, 1.67 nmol) (20). Under the lower s-Opa1 concentrations in  
208 our experiments (0.16  $\mu$ g/ml,  $2 \times 10^{-3}$  nmol), the supported bilayer remains intact (before and after  
209 GTP addition), and we do not observe any evidence of tubular structures forming in the liposomes  
210 or bilayers.

211

212 Our experiments indicate that s-Opa1 alone can induce tethering. Is s-Opa1 competent for close  
213 docking of membranes? To answer this, we evaluated close bilayer approach using a reporter for  
214 when membranes are brought within FRET distances ( $\sim 40$ -60 Å). This FRET signal reports on  
215 close membrane docking when a TexasRed conjugated PE is within FRET distance of a Cy5-



216 conjugated PE. We observed a low FRET signal for tethered membranes, when the FRET pair is  
217 between two supported bilayers tethered via PEG spacer (average distance between the bilayer  
218 centers of ~7 nm), compared to a single bilayer containing both of the FRET pair (**Figure 4-figure**  
219 **supplement 1A**). When l-Opa1 is present on both bilayers (homotypic arrangement), or on only  
220 one bilayer (heterotypic arrangement), efficient docking occurs in the presence of cardiolipin, as  
221 reported by a FRET signal with efficiencies of ~40% (**Figure 4B & C and Figure 4-figure**  
222 **supplement 1A**). Efficient homotypic docking requires GTP hydrolysis. GMPPCP prevents  
223 homotypic docking of l-Opa1, and abolishes the heterotypic l-Opa1 signal) (**Figure 4A**). In  
224 contrast, s-Opa1 alone does not bring the two bilayers within FRET distance, consistent with  
225 observations for s-Mgm1 tethered bilayers (**Figure 4A**) (34). The distances between two paddles  
226 in the s-Mgm1 dimer is ~120 Å. Tethering mediated by two paddle interactions would be  
227 compatible with our observed low FRET signal when s-Opa1 engages two bilayers (17).

228

### 229 **Hemifusion and pore opening**

230 We find that l-Opa1, when present on only one bilayer, in a heterotypic format, can mediate close  
231 membrane docking (**Figure 4A**). To quantify hemifusion (lipid exchange), we measured the  
232 fluorescence intensity decay times for the liposome dye (TexasRed) as it diffuses into the bilayer  
233 during lipid mixing. Analysis of particle dye diffusion kinetics show that in this heterotypic format,  
234 l-Opa1 can induce hemifusion (**Figure 5A**). The hemifusion efficiency (percentage of total  
235 particles where the proteoliposome dye diffuses into the supported bilayer) for heterotypic l-Opa1  
236 was <5% (**Figure 6A**). Previously published *in vitro* bulk liposome-based observations for  
237 heterotypic l-Opa1 lipid mixing observed hemifusion efficiencies of 5-10%, despite higher protein  
238 copy number per liposome (28). We next compared homotypic l-Opa1 catalyzed hemifusion and  
239 observed shorter mean dwell times than heterotypic l-Opa1 (**Figure 5B & 5C, Figure 5-figure**  
240 **supplement 1**). In our assay, we observe homotypic l-Opa1 induces hemifusion more efficiently  
241 than heterotypic l-Opa1. We measured a homotypic l-Opa1 hemifusion efficiency of ~15%  
242 (**Figure 6A**). For comparison, *in vitro* measurements of viral membrane hemifusion, show  
243 efficiencies of ~25-80% (35, 36). This comparison is imperfect, as viral particles have many more  
244 copies of their fusion proteins on their membrane surface and viral fusogens do not undergo  
245 multiple cycles of nucleotide hydrolysis, like Opa1.

246



247 Following hemifusion, pore opening is the key step where both leaflets merge and content from  
248 the two compartments can mix. We observed pore opening by monitoring content dye (calcein)  
249 release under these conditions (37). Of all homotypic tethered particles, ~18% undergo  
250 hemifusion. Of these particles undergoing hemifusion, approximately half proceed to full fusion  
251 (8% of all homotypic tethered particles). Both s-Opa1 alone (at 0.16  $\mu\text{g/ml}$ , or  $2 \times 10^{-3}$  nmol  
252 concentration), or l-Opa1 in the heterotypic format did not release content (**Figure 6A**). In contrast,  
253 ~8% of homotypic l-Opa1:l-Opa1 particles undergo pore opening and content release. These  
254 observations indicate, l-Opa1 alone is sufficient for pore opening, while s-Opa1 alone or  
255 heterotypic l-Opa1 are insufficient for full fusion.

256

### 257 **Ratio of s-Opa1:l-Opa1 regulate pore opening efficiency and kinetics**

258 Our observation that l-Opa1 is sufficient for pore opening leaves open the role of s-Opa1 for fusion.  
259 Previous studies suggest an active role for s-Mgm1 (the yeast orthologue of s-Opa1) in fusion (25).  
260 In this work, l-Mgm1 GTPase activity was dispensable for fusion in the presence of wild-type s-  
261 Mgm1 (25). Work in mammalian cells suggest different roles for s-Opa1. Studies from the Chan  
262 group showed Opa1 processing helps promote a tubular mitochondrial network (18). In contrast,  
263 other studies showed upregulated Opa1 processing in damaged or unhealthy mitochondria,  
264 resulting in accumulation of s-Opa1 and fragmented mitochondria (18, 28, 38). The interpretation  
265 of the latter experiments was that, in contrast to the yeast observations, s-Opa1 suppresses fusion  
266 activity. Furthermore, studies using Opa1 mutations that abolish processing of l-Opa1 to s-Opa1  
267 suggest the short form is dispensable for fusion, and s-Opa1 may even mediate fission (39, 40).  
268 These different, and at times opposing, interpretations of experimental observations have been  
269 difficult to reconcile.

270

271 To address how s-Opa1 and l-Opa1 cooperate, we added s-Opa1 to the l-Opa1 homotypic  
272 supported bilayer/liposome fusion experiment. l-Opa1-only homotypic fusion has an average  
273 dwell time of 20 s and an efficiency of ~10% (**Figure 6B-E & Figure 6-figure supplement 1**).  
274 Upon addition of s-Opa1, we observe a marked increase in pore opening efficiency, reaching 80%  
275 at equimolar l-Opa1 and s-Opa1 (**Figure 6B**). At equimolar levels of s-Opa1, we also observe a  
276 marked change in pore opening kinetics, with a four-fold decrease in mean dwell time (**Figure**  
277 **6C**). The efficiency peaks at an equimolar ratio of s-Opa1 to l-Opa1, showing that s-Opa1

278 cooperates with l-Opa1 to catalyze fast and efficient fusion. When s-Opa1 levels exceed l-Opa1  
279 (at a 2:1 ratio or greater), particles begin to detach, effectively reducing fusion efficiency. This is  
280 consistent with a dominant negative effect, where s-Opa1 likely disrupts the homotypic l-Opa1:l-  
281 Opa1 interaction. We quantified particle untethering, and observe a dose-dependent detachment  
282 of l-Opa1:l-Opa1 tethered particles with the addition of G300E s-Opa1 (**Figure S8**).

283

## 284 **Discussion**

285

286 Our experiments suggest different assembled forms of Opa1 represent functional intermediates  
287 along the membrane fusion reaction coordinate, each of which can be a checkpoint for membrane  
288 fusion and remodeling. We show that s-Opa1 alone is sufficient to mediate membrane tethering  
289 but is unable to dock and merge lipids in the two bilayers, and thus, insufficient for hemifusion  
290 (**Figure 7A**). In contrast, l-Opa1, in a heterotypic format, can tether and hemifuse bilayers, but is  
291 unable to transition through the final step of pore opening (**Figure 7B**). Homotypic l-Opa1 can  
292 hemifuse membranes and mediate low levels of pore opening (**Figure 7C i.**). However, our results  
293 show that s-Opa1 and l-Opa1 together, synergistically catalyze efficient and fast membrane pore  
294 opening (**Figure 7C ii.**). Importantly, we find that excess levels of s-Opa1 are inhibitory for pore  
295 opening, providing a means to down-regulate fusion activity (**Figure 7C iii.**).

296

297 Our model proposes that l-Opa1:s-Opa1 stoichiometry, resulting from proteolytic processing,  
298 gates the final step of fusion, pore opening. Electron tomography studies of mitofusin show a  
299 unevenly distributed ring of proteins clustering at an extensive site of close membrane docking,  
300 but only local regions of pore formation (41). Our study is consistent with local regions of contact  
301 and low protein copy number mediating lipid mixing and pore formation (42). Our study would  
302 predict that s-Opa1 enrichment in regions of the mitochondrial inner-membrane would suppress  
303 fusion. This study did not explore the roles of s-Opa1 assemblies (helical or 2-dimensional) in  
304 fusion (16). Cellular validation of our proposed model, and other states, will require correlating l-  
305 Opa1:s-Opa1 ratio and protein spatial distribution with fusion efficiency and kinetics. This studied  
306 focused on the S1 form of s-Opa1. The behavior of other Opa1 splice isoforms, which vary in the  
307 processing region, remains another important area for future investigation (43).

308

309 The results and model presented here help resolve the apparent contradicting nature of the Chan  
310 and Langer cellular observations. As observed by the Langer group, l-Opa1 alone in our system,  
311 is indeed sufficient for full fusion, albeit at very low levels (6). The activity of unprocessed Opa1  
312 was not ruled out in previous studies of Chan and colleagues (18). In contrast to the Langer group's  
313 conclusions, we find that Opa1 processing strongly stimulates fusion activity, as observed by the  
314 Chan and colleagues (18). Under conditions of s-Opa1 overexpression, Langer *et al.* observed, a  
315 fragmented mitochondrial network. We do not see any evidence for fission or fusion, for s-Opa1  
316 alone, under our reconstitution conditions. Instead, our data and model suggest this is due to s-  
317 Opa1 disrupting l-Opa1 activity, swinging the membrane dynamics equilibrium toward fission.

318  
319 Mitochondrial dysfunction is often associated with Opa1 processing (44). The activity of the  
320 mitochondrial inner-membrane proteases, Yme1L and Oma1, is regulated by mitochondrial matrix  
321 state, thereby coupling organelle health to fusion activity (6, 40, 44-46). Basal levels of Opa1  
322 cleavage are observed in healthy cells (18). Upon respiratory chain collapse and membrane  
323 depolarization increased protease activity elevates s-Opa1 levels, downregulating fusion (47). Our  
324 results point to the importance of basal Opa1 processing, and are consistent with observations that  
325 both over-processing and under-processing of l-Opa1 can result in a loss of function (6).

326  
327 Key questions remain in understanding the function of different Opa1 conformational states, and  
328 the nature of a fusogenic Opa1 complex. Recent structural studies show s-Mgm1 self-assembles  
329 via interfaces in the stalk region (16, 48). The nucleotide-independent tethering we observe also  
330 implicate stalk region interactions, outside of a GTPase-domain dimer, in membrane tethering.  
331 How does nucleotide hydrolysis influence these interactions during fusion? Outstanding questions  
332 also remain in understanding the cooperative interplay between local membrane environment, s-  
333 Opa1, and l-Opa1. Could the cooperative activity of l-Opa1 and s-Opa1 be mediated by direct  
334 protein-protein interactions, local membrane change, or both? Could tethered states (e.g.  
335 homotypic l-Opa1 or heterotypic l-Opa1) bridge bilayers to support membrane spacings seen in  
336 cristae? Answers to these questions, and others, await further mechanistic dissection to relate  
337 protein conformational state, *in situ* architecture and physiological regulation.

338  
339

340 **Acknowledgements**

341

342 We thank members of the Chao lab for helpful discussions and review of the manuscript. LHC is  
343 grateful for support from a Charles H. Hood Foundation Child Health Research Award. We thank  
344 Fanny Ng and the Szostak Lab for technical support. Work by XS and AWS are supported by the  
345 National Science Foundation under Grant No. CHE-1753060.

346

347 **Competing interests**

348

349 None

350 **Materials and Methods**

351

| <b>Key Resources Table</b>                |                                                                                                      |                            |                    |                               |
|-------------------------------------------|------------------------------------------------------------------------------------------------------|----------------------------|--------------------|-------------------------------|
| <b>Reagent type (species) or resource</b> | <b>Designation</b>                                                                                   | <b>Source or reference</b> | <b>Identifiers</b> | <b>Additional information</b> |
| Chemical compound, drug                   | 18:1 ( $\Delta$ 9-Cis) PC (DOPC)                                                                     | Avanti Polar lipids        | Cat #: 850375P     |                               |
| Chemical compound, drug                   | 1',3'-bis[1,2-dioleoyl-sn-glycero-3-phospho]-glycerol (sodium salt)                                  | Avanti Polar lipids        | Cat #: 710335P     |                               |
| Chemical compound, drug                   | 1,2-dioleoyl-sn-glycero-3-phosphoethanol amine-N-[methoxy(polyethylene glycol)-2000] (ammonium salt) | Avanti Polar lipids        | Cat #: 880130P     |                               |
| Chemical compound, drug                   | L- $\alpha$ -lysophosphatidyl inositol (Liver, Bovine) (sodium salt)                                 | Avanti Polar lipids        | Cat #: 850091P     |                               |
| Chemical compound, drug                   | 1-palmitoyl-2-oleoyl-sn-glycero-3-phosphoethanol amine                                               | Avanti Polar lipids        | Cat #: 850757P     |                               |

|                               |                                                                                                            |                                      |                                              |                                                                      |
|-------------------------------|------------------------------------------------------------------------------------------------------------|--------------------------------------|----------------------------------------------|----------------------------------------------------------------------|
| Chemical compound, drug       | Texas Red™<br>1,2-Dihexadecanoyl-sn-Glycero-3-Phosphoethanolamine, Triethylammonium Salt (Texas Red™ DHPE) | ThermoFisher Scientific              | Cat #: T1395MP                               |                                                                      |
| Chemical compound, drug       | 1,2-dioleoyl-sn-glycero-3-phosphoethanolamine-N-(Cyanine 5)                                                | Avanti polar lipid                   | Cat #: 810335C1mg                            |                                                                      |
| Chemical compound, drug       | Calcein                                                                                                    | Sigma-Aldrich                        | Cat #: C0875; PubChem Substance ID: 24892279 |                                                                      |
| <i>Pichia pastoris</i> strain | SMD1163 ( <i>his4, pep, prb1</i> )                                                                         | Rapoport lab; Harvard Medical School |                                              |                                                                      |
| Plasmid                       | pPICZ A-TwinStrep-IOPA1-H <sub>10</sub>                                                                    | GenScript                            |                                              | plasmid to transform and express human WT I-Opa1 (isoform1).         |
| Plasmid                       | pPICZ A-TwinStrep-sOPA1-H <sub>10</sub>                                                                    | GenScript                            |                                              | plasmid to transform and express human WT s-Opa1 (s1).               |
| Plasmid                       | pPICZ A-TwinStrep-IOPA1 (G300E)-H <sub>10</sub>                                                            | GenScript                            |                                              | plasmid to transform and express G300E mutant of I-Opa1 (isoform 1). |

|                         |                                                                         |                         |                     |                                                               |
|-------------------------|-------------------------------------------------------------------------|-------------------------|---------------------|---------------------------------------------------------------|
| Plasmid                 | pPICZ A-TwinStrep-sOPA1 (G300E)-H <sub>10</sub>                         | GenScript               |                     | plasmid to transform and express G300E mutant of s-Opa1 (s1). |
| Antibody                | Anti-Opa1 antibody                                                      | NOVUS BIOLOGICALS       | Cat #: NBP2-59770   | Western Blot 2 ug/ml                                          |
| Antibody                | 6x-His Tag Monoclonal Antibody (HIS.H8)                                 | ThermoFisher Scientific | Cat #: MA1-21315    | Western Blot 1:2000                                           |
| Antibody                | StrepMAB-Classic, HRP conjugate (2-1509-001)                            | IBA Lifesciences        | Cat #: 2-1509-001   | Western Blot 1:2500/1:32000                                   |
| Antibody                | Rabbit IgG HRP Linked Whole Ab                                          | SIGMA-ALDRICH INC       | Cat #: GENA934-1ML  |                                                               |
| Antibody                | Mouse IgG HRP Linked Whole Ab                                           | SIGMA-ALDRICH INC       | Cat #: GENA931-1ML  |                                                               |
| Chemical compound, drug | GTP Disodium salt                                                       | SIGMA-ALDRICH INC       | Cat #: 10106399001  |                                                               |
| Chemical compound, drug | EnzChek™ Phosphate Assay Kit                                            | ThermoFisher Scientific | Cat #: E6646        |                                                               |
| Chemical compound, drug | GppCp (Gmppcp), Guanosine-5'-[(β,γ)-methylene]triphosphate, Sodium salt | Jena Bioscience         | Cat #: NU-402-5     |                                                               |
| Chemical compound, drug | n-Dodecyl-β-D-Maltopyranoside                                           | Anatrace                | Cat #: D310 25 GM   |                                                               |
| Chemical compound, drug | n-Octyl-α-D-Glucopyranoside                                             | Anatrace                | Cat #: O311HA 25 GM |                                                               |



|                         |                                        |                                           |                    |  |
|-------------------------|----------------------------------------|-------------------------------------------|--------------------|--|
| Chemical compound, drug | Lauryl Maltose Neopentyl Glycol (LMNG) | Anatrace                                  | Cat #: NG310       |  |
| Chemical compound, drug | LMNG-CHS Pre-made solution             | Anatrace                                  | Cat #: NG310-CH210 |  |
| Drug                    | Zeocin                                 | Invivogen                                 | Cat #: ant-zn-1p   |  |
| Resin                   | Ni-NTA                                 | Biorad                                    | Cat #: 7800812     |  |
| Resin                   | StrepTactin XT                         | IBA Lifesciences                          | Cat #: 2-4026-001  |  |
| Chemical compound       | Biotin                                 | IBA Lifesciences                          | Cat #: 2-1016-005  |  |
| Resin                   | Superose 6 Increase 10/300 GL          | GE                                        | Cat #: 29091596    |  |
| Reagent                 | TEV protease                           | Prepared in lab, purchased from GenScript | Cat #: Z03030      |  |
| Reagent                 | Benzonase Nuclease                     | Sigma-Aldrich                             | Cat #: E1014       |  |
| Reagent                 | Protease inhibitor cocktail            | Roche                                     | Cat #: 05056489001 |  |
| Reagent                 | Leupeptin                              | Sigma-Aldrich                             | Cat #: L2884       |  |
| Reagent                 | Pepstatin A                            | Sigma-Aldrich                             | Cat #: P5318       |  |

|                      |                                      |                         |                    |  |
|----------------------|--------------------------------------|-------------------------|--------------------|--|
| Reagent              | Benzamidine hydrochloride hydrate    | Sigma-Aldrich           | Cat #: B6506       |  |
| Reagent              | Phenylmethylsulfonyl fluoride (PMSF) | Sigma-Aldrich           | Cat #: 10837091001 |  |
| Reagent              | Aprotinin                            | Sigma-Aldrich           | Cat #: A1153       |  |
| Reagent              | Trypsin inhibitor                    | Sigma-Aldrich           | Cat #: T9128       |  |
| Reagent              | Bestatin                             | GoldBio                 | Cat #: B-915-100   |  |
| Reagent              | E-64                                 | GoldBio                 | Cat #: E-064-25    |  |
| Reagent              | Phosphoramidon disodium salt         | Sigma-Aldrich           | Cat #: R7385       |  |
| Reagents for BN-PAGE | 3-12% Bis-Tris Protein Gels          | ThermoFisher Scientific | BN1003BOX          |  |
| Reagents for BN-PAGE | NativePAGE Running Buffer Kit        | ThermoFisher Scientific | BN2007             |  |
| Reagents for BN-PAGE | NativePAGE 5% G-250 Sample Additive  | ThermoFisher Scientific | BN2004             |  |
| Reagents for BN-PAGE | NativePAGE Sample Buffer (4X)        | ThermoFisher Scientific | BN2003             |  |
| software, algorithm  | Slidebook                            | Intelligent imaging     | RRID: SCR_014300   |  |

|                     |                   |                                |            |  |
|---------------------|-------------------|--------------------------------|------------|--|
| software, algorithm | Fiji /ImageJ      | Fiji                           | SCR_002285 |  |
| software, algorithm | FCS analysis tool | Smith Lab, University of Akron |            |  |

352

### 353 **Expression and purification**

354 Genes encoding l- (residues 88-960) or s- (residues 195-960) OPA1 (UniProt O60313-1) were  
355 codon optimized for expression in *Pichia pastoris* and synthesized by GenScript (NJ, USA). The  
356 sequences encode Twin-Strep-tag, HRV 3C site, (G<sub>4</sub>S)<sub>3</sub> linker at the N-terminus and (G<sub>4</sub>S)<sub>3</sub> linker,  
357 TEV site, deca-histidine tag at the C-terminus. The plasmids were transformed into the methanol  
358 inducible SMD1163 strain (gift from Dr. Tom Rapoport, Harvard Medical School) and the clones  
359 exhibiting high Opa1 expression were determined using established protocols. For purification,  
360 cells expressing l-Opa1 were resuspended in buffer A (50 mM sodium phosphate, 300 mM NaCl,  
361 1 mM 2-mercaptoethanol, pH 7.5) supplemented with benzonase nuclease and protease inhibitors  
362 and lysed using an Avestin EmulsiFlex-C50 high-pressure homogenizer. The membrane fractions  
363 were collected by ultracentrifugation at 235,000 x g for 45 min. at 4 °C. The pellet was resuspended  
364 in buffer A containing 2% DDM, (Anatrace, OH, USA) 0.1 mg/ml 18:1 cardiolipin (Avanti Polar  
365 Lipids, AL, USA) and protease inhibitors and stirred at 4 °C for 1 hr. The suspension was subjected  
366 to ultracentrifugation at 100,000 x g for 1 hr at 4 °C. The extract containing l-Opa1 was loaded  
367 onto a Ni-NTA column (Biorad, CA, USA), washed with 40 column volumes of buffer B (50 mM  
368 sodium phosphate, 350 mM NaCl, 1 mM 2-mercaptoethanol, 1 mM DDM, 0.025 mg/ml 18:1  
369 cardiolipin, pH 7.5) containing 25 mM imidazole and 60 column volumes of buffer B containing  
370 100 mM imidazole. The bound protein was eluted with buffer B containing 500 mM imidazole,  
371 buffer exchanged into buffer C (100 mM Tris-HCl, 150 mM NaCl, 1 mM EDTA, 1 mM 2-  
372 mercaptoethanol, 0.15 mM DDM, 0.025 mg/ml 18:1 cardiolipin, pH 8.0). In all the functional  
373 assays, the C-terminal His tag was cleaved by treatment with TEV protease and passed over the  
374 Ni-NTA and Strep-Tactin XT Superflow (IBA Life Sciences, Göttingen, Germany) columns  
375 attached in tandem. The Strep-Tactin XT column was detached, washed with buffer C and eluted  
376 with buffer C containing 50 mM biotin. The elution fractions were concentrated and subjected to  
377 size exclusion chromatography in buffer D (25 mM BIS-TRIS propane, 100 mM NaCl, 1 mM

378 TCEP, 0.025 mg/ml 18:1 cardiolipin, pH 7.5, 0.01% LMNG, 0.001% CHS). s-OPA1 was purified  
379 using a similar approach but with one difference: post lysis, the DDM was added to the unclarified  
380 lysate at 0.5% concentration and stirred for 30 min. – 1 hr. at 4 °C prior to ultracentrifugation. The  
381 supernatant was applied directly to the Ni-NTA column.

382

### 383 **GTPase activity assay**

384 The GTPase activity of purified Opa1 was analyzed using EnzCheck Phosphate Assay Kit  
385 (Thermo Fisher, USA) according to the vendor's protocol. Each condition was performed in  
386 triplicate. The GTPase assay buffers contained 25 mM HEPES, 60 mM NaCl, 100 mM KCl, 0.5  
387 mM MgCl<sub>2</sub> with 0.15 mM DDM. 60 μM GTP was added immediately before data collection. To  
388 compare the effect of cardiolipin on GTPase activity, additional 0.5 mg/ml Cardiolipin was  
389 dissolved in the reaction buffer and added to the reaction to a final concentration of 0.02 mg/ml.  
390 The absorbance at 340 nm of each reaction mixture was recorded using SpectraMax i3 plate reader  
391 (Molecular Devices) every 30 seconds. Experiments were performed in triplicate. Resulting Pi  
392 concentration was fitted to a single-phase exponential-decay, specific activity data were fitted to a  
393 Michaelis-Menten equation (GraphPad Prism 8.1).

394

### 395 **Preparation of polymer-tethered lipid bilayers**

396 Lipid reagents, including 1,2-dioleoyl-sn-glycero-3-phosphocholine, (DOPC); 1,2-dioleoyl-sn-  
397 glycero-3-phosphoethanolamine-N-[methoxy(polyethylene glycol)-2000] (DOPE-PEG2000), L-  
398 α-phosphatidylinositol (Liver PI) and 1',3'-bis[1,2-dioleoyl-sn-glycero-3-phospho]-glycerol  
399 (cardiolipin) were purchased from Avanti Polar Lipids (AL, USA). To fabricate the polymer-  
400 tethered lipid bilayers, we combined Langmuir-Blodgett and Langmuir-Schaefer techniques, using  
401 a Langmuir-Blodgett Trough (KSV-NIMA, NY, USA) (31, 49). For cardiolipin-free lipid bilayers,  
402 a lipid mixture with DOPC with 5 % (mol) DOPE-PEG2000 and 0.2 % (mol) Cy5-DSPE at the  
403 total concentration of 1 mg/ml was spread on the air water interface in a Langmuir trough. The  
404 surface pressure was kept at 30 mN/m for 30 minutes before dipping. The first lipid monolayer  
405 was transferred to the glass substrate (25 mm diameter glass cover slide, Fisher Scientific, USA)  
406 through Langmuir-Blodgett dipping, where the dipper was moved up at a speed of 22.5 mm/min.  
407 The second leaflet of the bilayer was assembled through Langmuir-Schaefer transfer after 1 mg/ml

408 of DOPC with 0.2 % (mol) Cy5-PE (Avanti Polar Lipids, AL, USA) was applied to an air-water  
409 interface and kept at a surface pressure of 30 mN/m.

410

411 Lipid bilayer with cardiolipin was fabricated in a similar manner, where the bottom leaflet included  
412 7 % (mol) Liver PI, 20 % (mol) cardiolipin, 20 % (mol) DOPE, 5 % (mol) DOPE-PEG2000, 0.2  
413 % (mol) Cy5-PE and 47.8% DOPC. The composition of the top leaflet of the bilayer was identical  
414 except for the absence of DOPE-PEG2000. To match the area/molecule at the air-water interface  
415 between CL-free and CL-containing bilayer, the film pressure was kept at 37 mN/m. The final  
416 average area per lipid, which is the key factor affecting lipid lateral mobility, was kept constant at  
417  $a_{\text{lipid}} = 65 \text{ \AA}^2$  (50).

418

419 Double bilayers were fabricated according to previous reports (51). The first bilayer containing  
420 DOPC with 5 % (mol) DSPE-PEG2000-Maleimide (Avanti Polar Lipids, AL, USA) and 0.2 %  
421 (mol) Cy5-DOPE in both inner and outer leaflets was made using Langmuir-Blodgett/Langmuir-  
422 Schaefer methods. The second planar lipid bilayer was formed by fusion of lipid vesicles and  
423 removal of non-fused vesicles. Lipid vesicles were formed by hydrating dried lipid films with  
424 DOPC, 0.2 % (mol) TexasRed-DHPE and 5 % (mol) of linker lipid (DPTE, AL, USA) in a 0.1  
425 mM sucrose/1 mM CaCl<sub>2</sub> solution. The lipid suspension was heated for 1.5 hours at 75 °C, and  
426 added to the first bilayer in a 0.1 mM glucose/1 mM CaCl<sub>2</sub> solution. After 2 hours of incubation,  
427 additional vesicles were removed by extensive rinsing. The bilayer was then imaged by TIRF  
428 microscope.

429

### 430 **Reconstitution of l-Opa1 into lipid bilayers**

431 Purified l-Opa1 was first desalted into 25 mM Bis-Tris buffer with 150mM NaCl containing 1.2  
432 nM DDM and 0.4 µg/L of cardiolipin to remove extra surfactant during purification. The resulting  
433 protein was added to each bilayer to the total amount of  $1.3 \times 10^{-12}$  mol (protein:lipid 1:10000)  
434 together with a surfactant mixture of 1.2 nM of DDM and 1.1 nM n-Octyl-β-D-Glucopyranoside  
435 (OG, Anatrace, OH, USA). The protein was incubated for 2 hours before removal of the surfactant.  
436 To remove the surfactant, Bio-Beads SM2 (Bio-Rad, CA, USA) was added to the solution at a  
437 final concentration of 10 µg beads per mL of solution and incubated for 10 minutes. Buffer with  
438 25 mM Bis-Tris and 150 mM NaCl was applied to remove the Bio-beads with extensive washing.

439 Successful reconstitution was determined using fluorescent correlation spectroscopy assay as  
440 described in the supplemental materials.

441

#### 442 **Preparation of liposomes and proteoliposomes**

443 To prepare calcein (MilliporeSigma, MA, USA) encapsulated liposomes, lipid mixtures (7 % (mol)  
444 PI, 20% cardiolipin, 20% PE, 0.2% TexasRed-PE, DOPC (52.8%)), were dissolved in chloroform  
445 and dried under argon flow for 25 minutes. The resulting lipid membrane was mixed in 25 mM  
446 Bis-Tris with 150mM NaCl and 50 mM calcein through vigorous vortexing. Lipid membranes  
447 were further hydrated by incubating the mixtures under 70 °C for 30 min. Large unilamellar  
448 vesicles (LUVs) were prepared by extrusion (15 to 20 times) using a mini-extruder with 200 nm  
449 polycarbonate membrane.

450

451 Proteoliposomes were prepared by adding purified l-Opal1 in 0.1 μM DDM to prepared liposomes  
452 at a protein: lipid of 1:5000 (2.5 μg l-Opal1 for 0.2 mg liposome) and incubated for 2 hours.  
453 Surfactant was removed by dialysis overnight under 4 °C using a 3.5 KDa dialysis cassette. Excess  
454 calcein was removed using a PD-10 desalting column. The final concentration of liposome was  
455 determined by TexasRed absorbance, measured in a SpectraMax i3 plate reader (Molecular  
456 Devices).

457

458 To evaluate l-Opal1 reconstitution into proteoliposomes, dye free liposome was prepared with  
459 TexasRed conjugated anti-His tag Antibody (ThermoFisher) by mixing lipids with antibody  
460 containing buffer. TexasRed Labeling efficiency of the antibody was calculated to be 1.05  
461 according to the vendor's protocol. Antibodies were added at a concentration of 2.6 μg/ml to 0.2  
462 mg/ml liposome. Following hydration through vortexing at room temperature for 15 minutes,  
463 Large unilamellar vesicles were formed following 20 times extrusion procedure described above.  
464 Liposomes labeled with 0.02 % (mol) TexasRed-PE were also prepared as a standard for  
465 quantifying reconstitution rate.

466

467 For the co-flotation analysis, 200 μl of 20 mg/ml TexasRed-DHPE (0.2 % (mol)) labeled  
468 proteoliposome (reconstitution ratio, protein:lipid 1:5000) was loaded to sucrose gradient (with  
469 steps of 0%, 15%, 30%, 60%). The volume of each fraction was 800 μl. Sucrose solutions were

470 prepared in Bis-Tris buffer (25mM Bis-Tris, 150 mM NaCl, pH 7.4). Samples were then  
471 centrifuged using a high-speed centrifuge equipped with SW 55i rotor (Beckmann Coulter, CA,  
472 USA) for 2.5 hrs at a speed of 30000 xg. For high salt and carbonate treatment, the same amount  
473 of proteoliposome was redistributed in Bis-Tris buffer with 500 mM NaCl (pH 7.4) and buffer  
474 containing 50 mM Na<sub>2</sub>CO<sub>3</sub> and 50 mM NaCl (pH 8.2), respectively. The resulting suspension was  
475 loaded in gradient for separation. After centrifugation, all fractions were collected and  
476 concentrated to 40 µl. Fractions were detected by western blot and then analyzed by ImageJ. The  
477 presence of liposomes was detected by absorbance at 590 nm using a DeNovix FX photometer  
478 (DeNovix, Inc).

479

### 480 **Fluorescent Correlation Spectroscopy**

481 Fluorescence correlation spectroscopy (FCS) was performed using a home-built PIE-FCCS system  
482 (52, 53). Two pulsed laser beams with wavelengths of 488 nm (9.7 MHz, 5 ps) and 561 nm (9.7  
483 MHz, 5 ps) were filtered out from a supercontinuum white light fiber laser (SuperK NKT  
484 Photonics, Birkerød, Denmark) and used as excitation beams. The laser beams were sent through  
485 a 100X TIRF objective (NA 1.47, oil, Nikon Corp., Tokyo, Japan) to excite the samples in solution  
486 or on bilayer. The emission photons were guided through a common 50 µm diameter pinhole. The  
487 light was spectrally separated by a 560 nm high-pass filter (AC254-100-A-ML, Thorlabs), further  
488 filtered by respective bandpass filters (green, 520/44 nm [FF01-520/44-25]; red, 612/69 nm [FF01-  
489 621/69-25], Semrock), and finally reach two single photon avalanche diode (SPAD) detectors  
490 (Micro Photon Devices). The synchronized photon data was collected using a time correlated  
491 single photon counting (TCSPC) module (PicoHarp 300, PicoQuant, Berlin, Germany).

492

493 The collected photon data was transformed into correlation functions with a home written  
494 MATLAB code. The correlation functions were fitted using two-dimensional (1) or three-  
495 dimensional (2) Brownian diffusion model for bilayer or solution samples respectively.

496

$$497 \quad G(\tau) = \frac{1}{\langle N \rangle} \frac{1}{1 + \tau/\tau_D} \quad (1)$$

$$498 \quad G(\tau) = \frac{1}{\langle N \rangle} \frac{1}{1 + \tau/\tau_D} \frac{1}{\sqrt{1 + \omega^2 \cdot \frac{\tau}{\tau_D}}} \quad (2)$$

499



500 Where  $N$  is the average number of particles in the system,  $\omega$  is the waist of the excitation beam,  
501 and  $\tau_D$  is the dwell time that can be used to calculate the diffusion coefficient ( $D$ ) of the particles.

502

$$503 \quad \tau_D = \frac{\omega^2}{4D}$$

504 (52)

505

506 Measurements were made on buffers with evenly distributed liposomes, proteoliposomes and  
507 antibodies in a glass-bottom 96 well plate at room temperature. The plates were pre-coated with  
508 lipid bilayer fabricated from 100 nm DOPC liposomes. For each solution, data was collected in  
509 five successive 15 second increments.

510

511 For characterization of l-Opal1 reconstitution into planar bilayers, an anti-Opal1 C-terminal  
512 antibody (Novus Biologicals, CO, USA) was used. The antibody was labeled by TexasRed (Texas  
513 Red™-X Protein Labeling Kit, ThermoFisher, CA, USA). Labeling efficiency of the antibody was  
514 determined as 1.52 TexasRed/antibody, as determined by NanoDrop (ThermoFisher, CA, USA).  
515 The labeled antibody was added to l-Opal1 in the supported bilayer at twice the total introduced  
516 Opal1 concentration. Excess antibody was removed by extensive rinsing.

517

518 To estimate reconstitution efficiency, 0.002 % (mol) l-Opal1 was added to the bilayer. In a separate  
519 experiment 0.002 % (mol) TexasRed-PE was introduced to the bilayer. The reconstitution  
520 efficiency was calculated from the anti-l-Opal1 antibody TexasRed fluorophore density divided by  
521 the TexasRed-PE fluorophore density, normalized by the antibody labeling efficiency (1.5 dye  
522 molecules/antibody).

523

#### 524 **Total Internal Reflection Fluorescent Microscopy (TIRF)**

525 Liposome docking and lipid exchange events were imaged using a Vector TIRF system (Intelligent  
526 Imaging Innovations, Inc, Denver, CO, USA) equipped with a W-view Gemini system  
527 (Hamamatsu photonics, Bridgewater, NJ). TIRF images were acquired using a 100X oil immersion  
528 objective (Ziess, N.A 1.4). A 543 nm laser was used for the analysis of TexasRed-PE embedded  
529 liposomes and proteoliposomes, while a 633 nm laser was applied for the analysis of Cy5-PE

530 embedded in the planar lipid bilayer. Fluorescent emission was simultaneously observed through  
531 a 609-emission filter with a band width of 40 nm and a 698-emission filter with a band width of  
532 70 nm. The microscope system was equipped with a Prime 95B scientific CMOS camera  
533 (Photometrics), maintained at -10 °C. Images were taken at room temperature, before adding any  
534 liposome or proteoliposome, after 15 mins of addition, and after 30 mins of adding GTP (1 mM)  
535 and MgCl<sub>2</sub> (1 mM). Each data point was acquired from 5 different bilayers, each bilayer data  
536 contains 5-10 particles on average.

537

538 Dwell times for hemifused particles were recorded from the moment of GTP addition for pre-  
539 tethered particles, until the time of half-maximal TexasRed signal decay. Full fusion events were  
540 recorded by monitoring the calcein channel at particle locations identified through the TexasRed  
541 signal. Particle identification and localization used both uTrack(54) and Slidebook (Intelligent  
542 Imaging Innovations, Inc., Denver, CO) built-in algorithms. To calibrate the point spread function  
543 100 nm and 50 nm fluorescent particles (ThermoFisher Scientific) were used. 2D Gaussian  
544 detection were applied in both cases. 2-way ANOVA tests was done using GraphPad Prism.  
545 Intensity and distribution of the particles were analyzed using ImageJ.

546

547 For analysis of protein reconstitution in proteoliposome (stoichiometry), a TIRF microscope  
548 modified from an inverted microscope (Nikon Eclipse Ti, Nikon Instruments) was used. A 561 nm  
549 diode laser (OBIS, Coherent Inc., Santa Clara, USA) was applied at TIRF angle through a 100X  
550 TIRF objective (NA 1.47, oil, Nikon) and the fluorescence signals were collected by an EMCCD  
551 camera (Evolve 512, Photometrics).

552

### 553 **Nanosight NTA analysis**

554 A NTA300 Nanosight instrument was used to evaluate size distribution of liposome and  
555 proteoliposome under different conditions. The equipment was equipped with a 405 nm laser and  
556 a CMOS camera. 1 ml of 0.1 µg/ml sample was measured, to reach the recommended particle  
557 number of  $1 \times 10^8$  particles/mL (corresponding to the dilution factor of 1:100,000). Image  
558 acquisition were conducted for 40 sec for each acquisition and repeated for 10 times for every  
559 injection. Three parallel samples were examined for the determination of size distribution. Under  
560 each run, the camera level was set to 12 and the detection threshold was set at 3.

561

562 **Blue native polyacrylamide gel electrophoresis (BN-PAGE)**

563 Bis-Tris gradient gels (3-12%) were purchased from ThermoFisher Scientific (Cat. No.  
564 BN1003BOX) and BN-PAGE was performed according to manufacturer's instructions. Gel  
565 samples (10  $\mu$ l) were prepared by mixing indicated quantity of Opa1 with sample buffer containing  
566 0.25% Coomassie G-250 and 1 mM DDM. For experiments involving l-Opa1 and s-Opa1  
567 mixtures, the samples were incubated on ice for 10 min before loading. The cathode buffer  
568 contained 1 mM DDM and electrophoresis was performed at 4°C with an ice jacket surrounding  
569 the apparatus.

570

571 **Figure Legends**

572

573 **Figure 1**

574 A. Mitochondrial membrane fusion involves sequential outer and inner membrane fusion. The  
575 mitofusins (Mfn1/2) catalyze outer membrane fusion. In metazoans, mitochondrial inner-  
576 membrane fusion is mediated by Opa1. B. Linear domain arrangement of l-Opa1. C. Schema of  
577 the experimental setup. D. Fusion assay. Membrane tethering, docking, lipid mixing, and content  
578 release can be distinguished using fluorescent reporters that specifically reflect each transition of  
579 the reaction.

580

581 **Figure 2**

582 A. Representative size-exclusion chromatograph and SDS-PAGE gel of human l-Opa1 purified  
583 from *P. pastoris*. B. SDS-PAGE gel of human s-Opa1 purified from *P. pastoris*. l-Opa1 activity,  
584 with velocity (C) and specific activity (D) of GTP hydrolysis in the presence and absence of  
585 cardiolipin, while varying protein concentration of Opa1. Data are shown as mean  $\pm$  SD, with error  
586 bars from 3 independent experiments. Representative single-liposome photobleaching steps (E &  
587 F) and histogram of step sizes (distribution for 110 liposomes shown) (G). Source data: Figure2-  
588 source data1.zip

589

590 **Figure 2 – figure supplement 1**

591 GTP hydrolysis (GTPase) activity of l-Opa1 (A) and s-Opa1 (B) in the presence and absence of  
592 cardiolipin. Both G300E l-Opa1 and G300E s-Opa1 do not show any GTPase activity (C & D).  
593 Mixing G300E s-Opa1 with WT l-Opa1 at 1:1 molar ratio (E) does not alter the GTPase activity  
594 of, detergent solubilized, WT l-Opa1 significantly (E and A,  $P > 0.2$ , t-test). A similar effect is seen  
595 upon addition of G300E l-Opa1 to WT s-Opa1 at 1:1 ratio (F). Under these conditions, s-Opa1  
596 GTPase activity is similar to s-Opa1 alone (F & B,  $P > 0.2$ , t-test). Data shown as mean  $\pm$  SD, error  
597 bars from 3 experiments. Source data: Figure 2-fig sup 1-source data1.zip

598

599 **Figure 2 – figure supplement 2**

600 Liposome co-floitation analysis: Reconstituted l-OPA1 co-floats with liposomes both with and  
601 without cardiolipin (A & D). Liposomes were labeled with 0.2 % (mol) TexasRed-DHPE and their  
602 distribution was confirmed by liposome dye absorbance at 590 nm. Opa1 distribution was analyzed  
603 by Western blot. Opa1/liposome fractions was mostly found near 15~30% sucrose. This  
604 reconstitution is stable under high salt (B & E) or carbonate conditions (C & F). s-OPA1 interacts  
605 with liposomes in a cardiolipin-dependent manner (G-L). This interaction is resistant to high salt  
606 (H) but sensitive to carbonate treatment (I), where the protein was found in the bottom fractions  
607 lacking liposome (60% sucrose). s-OPA1 does not associate with DOPC liposomes (J-L). These  
608 results indicate that l-OPA1 was successfully reconstituted through integral transmembrane region,  
609 whereas the s-OPA1 bilayer-association is through a cardiolipin:s-OPA1 peripheral membrane  
610 interaction. Source data: Figure 2-fig sup 2-source data1.zip

611

### 612 **Figure 2 – figure supplement 3**

613 Epifluorescence image of polymer-tethered lipid bilayers before (A) and after Opa1 reconstitution  
614 (B), showing a homogeneous lipid bilayer. Scale bar: 10  $\mu$ m. FCS profiles of TexasRed-PE and  
615 TexasRed labeled anti-Opa1 antibody show slower diffusion for reconstituted l-OPA1 (C),  
616 indicating successful reconstitution, and that the reconstituted l-OPA1 diffuses freely. Source data:  
617 Figure 2-fig sup 3-source data1.zip

618

### 619 **Figure 2 – figure supplement 4**

620 A. Blue native (BN-PAGE) gels show WT l-OPA1 and s-OPA1 can self-assemble as oligomers in  
621 DDM. B. Mixtures of WT l-OPA1 and WT s-OPA1 show a range of species from ~480 KDa - ~1  
622 MDa. G300E l-OPA1, in the presence of WT s-OPA1, does not alter this gel migration pattern. In  
623 contrast, complexes comprising WT l-OPA1 and G300E s-OPA1 show a slight shift to a population  
624 mainly containing a ~480 Kda and 720 KDa species.

625

### 626 **Figure 2 – figure supplement 5**

627 Fluorescence autocorrelation profiles of TexasRed labeled anti-His antibody in the presence of  
628 unlabeled liposomes (A), and TexasRed-PE-labeled liposomes (B), showing diffusion coefficients  
629 of unbound antibody versus liposomes. FCS profile of reconstituted l-OPA1 (detected with a

630 TexasRed labeled antibody) (C) is similar to that of dye-labeled liposomes (B), indicating  
631 successful reconstitution of Opa1. Source data: Figure 2-fig sup 5-source data1.zip

632

### 633 **Figure 3**

634 The number of liposomes tethered on the planar bilayers in a homotypic format (l-Opa1 on both  
635 bilayers) increases in the presence of GTP, when both bilayers contain cardiolipin. A.  
636 Representative images of liposomes tethered on lipid bilayer (both containing cardiolipin) before  
637 (apo, or nucleotide free) and after GTP addition. Scale bar: 5 $\mu$ m. B. Bar graph: In the presence of  
638 cardiolipin, addition of GTP doubles the number of liposomes. (\*\*\*p<0.001, two way ANOVA).  
639 C. Addition of GMPPCP decreases amount of tethered l-Opa1 liposomes (apo, indicating  
640 nucleotide free) (P<0.005, two-way ANOVA). D. l-Opa1 in the liposome bilayer alone is sufficient  
641 to tether liposomes to a cardiolipin containing bilayer. Tethering is enhanced in the presence of  
642 GTP (apo, indicating nucleotide free) (P<0.005, two-way ANOVA). E. s-Opa1 tethers liposomes  
643 to a cardiolipin-containing bilayer. Number of tethered liposomes when both bilayer and liposomes  
644 contain 20% (mol) cardiolipin. Before addition of GTP (apo, indicating nucleotide-free), a  
645 moderate amount of liposome tethering was observed. The addition of GTP enhances this tethering  
646 effect (P<0.005, two-way ANOVA). Data are shown as mean  $\pm$  SD. Error bars are from 5  
647 independent experiments (> 10 images across one bilayer per for each experiment). Source data:  
648 Figure 3-source data1.zip

649

### 650 **Figure 3 – figure supplement 1**

651 Effect of s-Opa1 competition on membrane tethering. Addition of G300E s-Opa1 detaches the l-  
652 Opa1 proteoliposomes tethered to l-Opa1-containing supported lipid (A). G300E l-Opa1 does not  
653 tether liposomes to a supported bilayer (B). G300E l-Opa1 in the presence of G300E s-Opa1 also  
654 does not tether membranes. Source data: Figure 3-fig sup 1-source data1.zip

655

### 656 **Figure 3 – figure supplement 2**

657 Normalized relative and cumulative size distributions show cardiolipin containing  
658 proteoliposomes shift to larger sizes 1 hour following GTP addition (green trace), as measured by  
659 Nanosight light scattering. Source data: Figure 3-fig sup 2-source data1.zip

660

661 **Figure 4**

662 A. Homotypic l-Opa1 docks liposomes in a GTP-hydrolysis dependent manner. s-Opa1, alone is  
663 insufficient to closely dock liposomes. l-Opa1 in a heterotypic format (on the liposome alone) is  
664 competent to closely dock to a bilayer, but this docking is not stimulated by nucleotide. Bar graphs  
665 shown as mean  $\pm$  SD ( $P < 0.0001$ , one-way ANOVA). Error bars are from 3-5 independent  
666 experiments (each experiment with  $>150$  particles in a given bilayer). B. In the presence of  
667 cardiolipin on both bilayers, FRET signal reports on close liposome docking mediated by l-Opa1.  
668 Left: Green = Cy5 emission signal upon excitation at 543 (TexasRed excitation). Red = Cy5  
669 emission signal in membrane upon excitation at 633 (Cy5 excitation). Right: Green = TexasRed  
670 emission upon excitation at 543 nm (TexasRed excitation). Scale bar:  $5\mu\text{m}$ . Source data: Figure 4-  
671 source data1.zip

672

673 **Figure 4 – figure supplement 1**

674 A. Controls for intra-membrane and inter-membrane FRET: When both TexasRed and Cy5 PE are  
675 present in the same bilayer, high FRET efficiency is observed. When TexasRed and Cy5 PE are  
676 present in two different bilayers, with a  $\sim 7$  nm tethering distance (from bilayer center to bilayer  
677 center in the double bilayer stack), FRET efficiency was low (data analyzed from 10 random spots  
678 in 2 bilayers ( $P < 0.0001$ , t test). Analysis of  $\sim 20$  particles show  $\sim 40\%$  FRET efficiency for both  
679 homotypic and heterotypic tethering. This indicates that l-Opa1 is able to bring the two membranes  
680 within close proximity ( $< 7$  nm) without mixing the two membranes. B. Quantification of DOPC  
681 liposomes tethered to a DOPC bilayer containing reconstituted l-Opa1. Liposomes do not tether to  
682 the supported bilayer, indicating that in the absence of cardiolipin, l-Opa1 does not tether  
683 liposomes alone. The lack of liposome docking to exposed regions also argues that few defects  
684 were introduced into the bilayer following reconstitution. Data from 3 different bilayers. Source  
685 data: Figure 4-fig sup 1-source data1.zip

686

687 **Figure 5**

688 A. Heterotypic hemifusion. Top panels: time trace of proteo-liposome lipid dye diffusion  
689 (TexasRed). Bottom panels: no content release is observed for this particle (calcein signal remains  
690 quenched). Scale bar:  $1\mu\text{m}$ . B. Homotypic hemifusion. Top panels: time trace of liposome lipid



691 dye diffusion (TexasRed). Bottom panels: no content release is observed for this particle (calcein  
692 signal remains quenched). Scale bar: 1  $\mu\text{m}$ . C. Representative intensity traces of a control particle  
693 not undergoing fusion (black), with heterotypic hemifusion event (solid red), and homotypic  
694 hemifusion event (dotted red). Source data: Figure 5-source data1.zip

695

#### 696 **Figure 5 – figure supplement 1**

697 Additional kinetic traces for hemifusion curves under homotypic (A) and heterotypic (B) Opa1  
698 hemifusion conditions. Control particle trace shown in black. Hemifusion trace shown in red.  
699 Source data: Figure 5-fig sup 1-source data1.zip

700

#### 701 **Figure 6**

702 A. Hemifusion (lipid mixing) and full fusion (content release and pore opening) efficiency for  
703 homotypic l-Opa1, heterotypic l-Opa1 and s-Opa1 ( $P < 0.001$ , two-way ANOVA). Bar graphs  
704 shown as mean  $\pm$  SD. Error bars are from 5 different experiments (50-200 particles were analyzed  
705 per bilayer in each experiment). B. Full fusion (pore opening) efficiency at different s-Opa1:l-  
706 Opa1 ratios. Data is shown as mean  $\pm$  SD. Error bars are from 4-6 experiments (80-150 particles  
707 per bilayer in each experiment). The significance of the data was confirmed using one-way  
708 ANOVA (Prism 8.3) where  $P < 0.0001$ . C. Mean pore opening time in the absence of s-Opa1 and  
709 at equimolar s-Opa1. Significance of the difference was confirmed using t-test (Prism 8.3,  
710  $P < 0.0001$ ). D. Representative hemifusion and pore opening fluorescence time series for homotypic  
711 l-Opa1 experiment, in the absence of s-Opa1, top and bottom panels, respectively. Scale bar: 1  
712  $\mu\text{m}$ . E: representative traces of TexasRed (liposome signal) and calcein (content signal) intensity  
713 for homotypic l-Opa1 experiment. F. Representative hemifusion and pore opening fluorescence  
714 traces for a homotypic l-Opa1 experiment in the presence of equimolar s-Opa1. Scale bar: 1  $\mu\text{m}$ .  
715 G: Representative trace of TexasRed (liposome signal) and calcein (content signal) intensity for a  
716 homotypic l-Opa1 experiment in the presence of equimolar s-Opa1. Source data: Figure 6-source  
717 data1.zip

718

#### 719 **Figure 6 – figure supplement 1**

720 Additional kinetic traces for hemifusion and pore opening under homotypic l-Opa1 conditions (A),  
721 homotypic l-Opa1, and l-Opa1 + s-Opa1 (1:1) (B) conditions. Hemifusion (TexasRed) trace show

722 in red. Pore opening (calcein, content release) trace shown in green. Figure 6-fig sup1-source  
723 data1.zip

724

725 **Figure 7**

726 Summary model for modes of regulation in Opa1-mediated membrane fusion. A. s-Opa1 alone is  
727 capable of tethering bilayers, but insufficient for close membrane docking and hemifusion. B. l-  
728 Opa1, in a heterotypic arrangement, can tether bilayers, and upon GTP stimulation promote low  
729 levels of lipid mixing, but no full fusion, pore opening or content release. C. Homotypic l-Opa1-l-  
730 Opa1 tethered bilayers can mediate full content release (i). This activity is greatly stimulated by  
731 the presence of s-Opa1, with peak activity at 1:1 s-Opa1:l-Opa1 (ii). Excess levels of s-Opa1  
732 suppress fusion, likely through competing with the l-Opa1-l-Opa1 homotypic tethering interface  
733 (iii).

734

735

## 736 References

- 737 1. Hoppins S, Lackner L, Nunnari J. The machines that divide and fuse mitochondria. *Annu*  
738 *Rev Biochem.* 2007;76:751-80. Epub 2007/03/17. doi:  
739 10.1146/annurev.biochem.76.071905.090048. PubMed PMID: 17362197.
- 740 2. Cipolat S, Rudka T, Hartmann D, Costa V, Serneels L, Craessaerts K, Metzger K, Frezza  
741 C, Annaert W, D'Adamio L, Derks C, Dejaegere T, Pellegrini L, D'Hooge R, Scorrano L, De  
742 Strooper B. Mitochondrial rhomboid PARL regulates cytochrome c release during apoptosis via  
743 OPA1-dependent cristae remodeling. *Cell.* 2006;126(1):163-75. Epub 2006/07/15. doi:  
744 10.1016/j.cell.2006.06.021. PubMed PMID: 16839884.
- 745 3. Cogliati S, Frezza C, Soriano ME, Varanita T, Quintana-Cabrera R, Corrado M, Cipolat S,  
746 Costa V, Casarin A, Gomes LC, Perales-Clemente E, Salviati L, Fernandez-Silva P, Enriquez JA,  
747 Scorrano L. Mitochondrial cristae shape determines respiratory chain supercomplexes assembly  
748 and respiratory efficiency. *Cell.* 2013;155(1):160-71. Epub 2013/09/24. doi:  
749 10.1016/j.cell.2013.08.032. PubMed PMID: 24055366; PMCID: PMC3790458.
- 750 4. Nunnari J, Suomalainen A. Mitochondria: in sickness and in health. *Cell.*  
751 2012;148(6):1145-59. doi: 10.1016/j.cell.2012.02.035. PubMed PMID: 22424226; PMCID:  
752 PMC5381524.
- 753 5. Westermann B. Mitochondrial fusion and fission in cell life and death. *Nat Rev Mol Cell*  
754 *Biol.* 2010;11(12):872-84. doi: 10.1038/nrm3013. PubMed PMID: 21102612.
- 755 6. Anand R, Wai T, Baker MJ, Kladt N, Schauss AC, Rugarli E, Langer T. The i-AAA  
756 protease YME1L and OMA1 cleave OPA1 to balance mitochondrial fusion and fission. *J Cell*  
757 *Biol.* 2014;204(6):919-29. doi: 10.1083/jcb.201308006. PubMed PMID: 24616225; PMCID:  
758 PMC3998800.
- 759 7. Chen H, Detmer SA, Ewald AJ, Griffin EE, Fraser SE, Chan DC. Mitofusins Mfn1 and  
760 Mfn2 coordinately regulate mitochondrial fusion and are essential for embryonic development. *J*  
761 *Cell Biol.* 2003;160(2):189-200. Epub 2003/01/16. doi: 10.1083/jcb.200211046. PubMed PMID:  
762 12527753; PMCID: PMC2172648.
- 763 8. Alexander C, Votruba M, Pesch UE, Thiselton DL, Mayer S, Moore A, Rodriguez M,  
764 Kellner U, Leo-Kottler B, Auburger G, Bhattacharya SS, Wissinger B. OPA1, encoding a  
765 dynamin-related GTPase, is mutated in autosomal dominant optic atrophy linked to chromosome  
766 3q28. *Nat Genet.* 2000;26(2):211-5. Epub 2000/10/04. doi: 10.1038/79944. PubMed PMID:  
767 11017080.
- 768 9. Meeusen S, DeVay R, Block J, Cassidy-Stone A, Wayson S, McCaffery JM, Nunnari J.  
769 Mitochondrial inner-membrane fusion and crista maintenance requires the dynamin-related  
770 GTPase Mgm1. *Cell.* 2006;127(2):383-95. Epub 2006/10/24. doi: 10.1016/j.cell.2006.09.021.  
771 PubMed PMID: 17055438.
- 772 10. Meeusen S, McCaffery JM, Nunnari J. Mitochondrial fusion intermediates revealed in  
773 vitro. *Science.* 2004;305(5691):1747-52. Epub 2004/08/07. doi: 10.1126/science.1100612.  
774 PubMed PMID: 15297626.
- 775 11. MacVicar T, Langer T. OPA1 processing in cell death and disease - the long and short of  
776 it. *J Cell Sci.* 2016;129(12):2297-306. Epub 2016/05/18. doi: 10.1242/jcs.159186. PubMed PMID:  
777 27189080.
- 778 12. Olichon A, Baricault L, Gas N, Guillou E, Valette A, Belenguer P, Lenaers G. Loss of  
779 OPA1 perturbs the mitochondrial inner membrane structure and integrity, leading to  
780 cytochrome c release and apoptosis. *J Biol Chem.* 2003;278(10):7743-6. Epub 2003/01/02. doi:  
781 10.1074/jbc.C200677200. PubMed PMID: 12509422.

- 782 13. Pesch UE, Leo-Kottler B, Mayer S, Jurklies B, Kellner U, Apfelstedt-Sylla E, Zrenner E,  
783 Alexander C, Wissinger B. OPA1 mutations in patients with autosomal dominant optic atrophy  
784 and evidence for semi-dominant inheritance. *Hum Mol Genet.* 2001;10(13):1359-68. Epub  
785 2001/07/07. doi: 10.1093/hmg/10.13.1359. PubMed PMID: 11440988.
- 786 14. Schmid SL, Frolov VA. Dynamin: functional design of a membrane fission catalyst. *Annu*  
787 *Rev Cell Dev Biol.* 2011;27:79-105. doi: 10.1146/annurev-cellbio-100109-104016. PubMed  
788 PMID: 21599493.
- 789 15. Ramachandran R, Schmid SL. The dynamin superfamily. *Curr Biol.* 2018;28(8):R411-R6.  
790 doi: 10.1016/j.cub.2017.12.013. PubMed PMID: 29689225.
- 791 16. Faelber K, Dietrich L, Noel JK, Wollweber F, Pfitzner AK, Muhleip A, Sanchez R,  
792 Kudryashev M, Chiaruttini N, Lilie H, Schlegel J, Rosenbaum E, Hessenberger M, Matthaeus C,  
793 Kunz S, von der Malsburg A, Noe F, Roux A, van der Laan M, Kuhlbrandt W, Daumke O.  
794 Structure and assembly of the mitochondrial membrane remodelling GTPase Mgm1. *Nature.* 2019.  
795 doi: 10.1038/s41586-019-1372-3. PubMed PMID: 31292547.
- 796 17. Faelber K, Posor Y, Gao S, Held M, Roske Y, Schulze D, Haucke V, Noe F, Daumke O.  
797 Crystal structure of nucleotide-free dynamin. *Nature.* 2011;477(7366):556-60. Epub 2011/09/20.  
798 doi: 10.1038/nature10369. PubMed PMID: 21927000.
- 799 18. Mishra P, Carelli V, Manfredi G, Chan DC. Proteolytic cleavage of Opa1 stimulates  
800 mitochondrial inner membrane fusion and couples fusion to oxidative phosphorylation. *Cell*  
801 *Metab.* 2014;19(4):630-41. doi: 10.1016/j.cmet.2014.03.011. PubMed PMID: 24703695; PMCID:  
802 PMC4018240.
- 803 19. Ehses S, Raschke I, Mancuso G, Bernacchia A, Geimer S, Tondera D, Martinou JC,  
804 Westermann B, Rugarli EI, Langer T. Regulation of OPA1 processing and mitochondrial fusion  
805 by m-AAA protease isoenzymes and OMA1. *J Cell Biol.* 2009;187(7):1023-36. Epub 2009/12/30.  
806 doi: 10.1083/jcb.200906084. PubMed PMID: 20038678; PMCID: PMC2806285.
- 807 20. Ban T, Heymann JA, Song Z, Hinshaw JE, Chan DC. OPA1 disease alleles causing  
808 dominant optic atrophy have defects in cardiolipin-stimulated GTP hydrolysis and membrane  
809 tubulation. *Hum Mol Genet.* 2010;19(11):2113-22. doi: 10.1093/hmg/ddq088. PubMed PMID:  
810 20185555; PMCID: PMC2865371.
- 811 21. Frezza C, Cipolat S, Martins de Brito O, Micaroni M, Beznoussenko GV, Rudka T, Bartoli  
812 D, Polishuck RS, Danial NN, De Strooper B, Scorrano L. OPA1 controls apoptotic cristae  
813 remodeling independently from mitochondrial fusion. *Cell.* 2006;126(1):177-89. Epub  
814 2006/07/15. doi: 10.1016/j.cell.2006.06.025. PubMed PMID: 16839885.
- 815 22. Ford MG, Jenni S, Nunnari J. The crystal structure of dynamin. *Nature.*  
816 2011;477(7366):561-6. Epub 2011/09/20. doi: 10.1038/nature10441. PubMed PMID: 21927001;  
817 PMCID: PMC4075756.
- 818 23. Antonny B, Burd C, De Camilli P, Chen E, Daumke O, Faelber K, Ford M, Frolov VA,  
819 Frost A, Hinshaw JE, Kirchhausen T, Kozlov MM, Lenz M, Low HH, McMahon H, Merrifield C,  
820 Pollard TD, Robinson PJ, Roux A, Schmid S. Membrane fission by dynamin: what we know and  
821 what we need to know. *EMBO J.* 2016;35(21):2270-84. Epub 2016/11/04. doi:  
822 10.15252/embj.201694613. PubMed PMID: 27670760; PMCID: PMC5090216.
- 823 24. Chappie JS, Acharya S, Leonard M, Schmid SL, Dyda F. G domain dimerization controls  
824 dynamin's assembly-stimulated GTPase activity. *Nature.* 2010;465(7297):435-40. Epub  
825 2010/04/30. doi: 10.1038/nature09032. PubMed PMID: 20428113; PMCID: PMC2879890.
- 826 25. DeVay RM, Dominguez-Ramirez L, Lackner LL, Hoppins S, Stahlberg H, Nunnari J.  
827 Coassembly of Mgm1 isoforms requires cardiolipin and mediates mitochondrial inner membrane

- 828 fusion. *J Cell Biol.* 2009;186(6):793-803. doi: 10.1083/jcb.200906098. PubMed PMID:  
829 19752025; PMCID: PMC2753158.
- 830 26. Herlan M, Vogel F, Bornhovd C, Neupert W, Reichert AS. Processing of Mgm1 by the  
831 rhomboid-type protease Pcp1 is required for maintenance of mitochondrial morphology and of  
832 mitochondrial DNA. *J Biol Chem.* 2003;278(30):27781-8. Epub 2003/04/23. doi:  
833 10.1074/jbc.M211311200. PubMed PMID: 12707284.
- 834 27. Song Z, Chen H, Fiket M, Alexander C, Chan DC. OPA1 processing controls  
835 mitochondrial fusion and is regulated by mRNA splicing, membrane potential, and Yme1L. *J Cell*  
836 *Biol.* 2007;178(5):749-55. Epub 2007/08/22. doi: 10.1083/jcb.200704110. PubMed PMID:  
837 17709429; PMCID: PMC2064540.
- 838 28. Ban T, Ishihara T, Kohno H, Saita S, Ichimura A, Maenaka K, Oka T, Mihara K, Ishihara  
839 N. Molecular basis of selective mitochondrial fusion by heterotypic action between OPA1 and  
840 cardiolipin. *Nat Cell Biol.* 2017;19(7):856-63. doi: 10.1038/ncb3560. PubMed PMID: 28628083.
- 841 29. Del Dotto V, Fogazza M, Carelli V, Rugolo M, Zanna C. Eight human OPA1 isoforms,  
842 long and short: What are they for? *Biochim Biophys Acta Bioenerg.* 2018;1859(4):263-9. Epub  
843 2018/02/01. doi: 10.1016/j.bbabi.2018.01.005. PubMed PMID: 29382469.
- 844 30. Naumann C, Prucker O, Lehmann T, Ruhe J, Knoll W, Frank CW. The polymer-supported  
845 phospholipid bilayer: tethering as a new approach to substrate-membrane stabilization.  
846 *Biomacromolecules.* 2002;3(1):27-35. Epub 2002/02/28. PubMed PMID: 11866552.
- 847 31. Siegel AP, Kimble-Hill A, Garg S, Jordan R, Naumann CA. Native ligands change integrin  
848 sequestering but not oligomerization in raft-mimicking lipid mixtures. *Biophys J.*  
849 2011;101(7):1642-50. Epub 2011/10/04. doi: 10.1016/j.bpj.2011.08.040. PubMed PMID:  
850 21961590; PMCID: PMC3183796.
- 851 32. Liu TY, Bian X, Romano FB, Shemesh T, Rapoport TA, Hu J. Cis and trans interactions  
852 between atlastin molecules during membrane fusion. *Proc Natl Acad Sci U S A.*  
853 2015;112(15):E1851-60. Epub 2015/04/01. doi: 10.1073/pnas.1504368112. PubMed PMID:  
854 25825753; PMCID: PMC4403200.
- 855 33. O'Donnell JP, Cooley RB, Kelly CM, Miller K, Andersen OS, Rusinova R, Sonderrmann  
856 H. Timing and Reset Mechanism of GTP Hydrolysis-Driven Conformational Changes of Atlastin.  
857 *Structure.* 2017;25(7):997-1010 e4. Epub 2017/06/13. doi: 10.1016/j.str.2017.05.007. PubMed  
858 PMID: 28602821; PMCID: PMC5516944.
- 859 34. Abutbul-Ionita I, Rujviphath J, Nir I, McQuibban GA, Danino D. Membrane tethering and  
860 nucleotide-dependent conformational changes drive mitochondrial genome maintenance (Mgm1)  
861 protein-mediated membrane fusion. *J Biol Chem.* 2012;287(44):36634-8. Epub 2012/09/15. doi:  
862 10.1074/jbc.C112.406769. PubMed PMID: 22977249; PMCID: PMC3481265.
- 863 35. Chao LH, Klein DE, Schmidt AG, Pena JM, Harrison SC. Sequential conformational  
864 rearrangements in flavivirus membrane fusion. *Elife.* 2014;3:e04389. Epub 2014/12/06. doi:  
865 10.7554/eLife.04389. PubMed PMID: 25479384; PMCID: PMC4293572.
- 866 36. Ivanovic T, Choi JL, Whelan SP, van Oijen AM, Harrison SC. Influenza-virus membrane  
867 fusion by cooperative fold-back of stochastically induced hemagglutinin intermediates. *Elife.*  
868 2013;2:e00333. Epub 2013/04/04. doi: 10.7554/eLife.00333. PubMed PMID: 23550179; PMCID:  
869 PMC3578201.
- 870 37. Rawle RJ, van Lengerich B, Chung M, Bendix PM, Boxer SG. Vesicle fusion observed by  
871 content transfer across a tethered lipid bilayer. *Biophys J.* 2011;101(8):L37-9. Epub 2011/10/19.  
872 doi: 10.1016/j.bpj.2011.09.023. PubMed PMID: 22004762; PMCID: PMC3192961.



- 873 38. Griparic L, Kanazawa T, van der Blik AM. Regulation of the mitochondrial dynamin-like  
874 protein Opa1 by proteolytic cleavage. *J Cell Biol.* 2007;178(5):757-64. Epub 2007/08/22. doi:  
875 10.1083/jcb.200704112. PubMed PMID: 17709430; PMCID: PMC2064541.
- 876 39. Lee H, Smith SB, Yoon Y. The short variant of the mitochondrial dynamin OPA1  
877 maintains mitochondrial energetics and cristae structure. *J Biol Chem.* 2017;292(17):7115-30. doi:  
878 10.1074/jbc.M116.762567. PubMed PMID: 28298442; PMCID: PMC5409478.
- 879 40. Baker MJ, Lampe PA, Stojanovski D, Korwitz A, Anand R, Tatsuta T, Langer T. Stress-  
880 induced OMA1 activation and autocatalytic turnover regulate OPA1-dependent mitochondrial  
881 dynamics. *EMBO J.* 2014;33(6):578-93. doi: 10.1002/embj.201386474. PubMed PMID:  
882 24550258; PMCID: PMC3989652.
- 883 41. Brandt T, Cavellini L, Kuhlbrandt W, Cohen MM. A mitofusin-dependent docking ring  
884 complex triggers mitochondrial fusion in vitro. *Elife.* 2016;5. Epub 2016/06/03. doi:  
885 10.7554/eLife.14618. PubMed PMID: 27253069; PMCID: PMC4929004.
- 886 42. Zick M, Duvezin-Caubet S, Schafer A, Vogel F, Neupert W, Reichert AS. Distinct roles  
887 of the two isoforms of the dynamin-like GTPase Mgm1 in mitochondrial fusion. *FEBS Lett.*  
888 2009;583(13):2237-43. Epub 2009/06/10. doi: 10.1016/j.febslet.2009.05.053. PubMed PMID:  
889 19505460.
- 890 43. Wai T, Langer T. Mitochondrial Dynamics and Metabolic Regulation. *Trends Endocrinol*  
891 *Metab.* 2016;27(2):105-17. doi: 10.1016/j.tem.2015.12.001. PubMed PMID: 26754340.
- 892 44. Duvezin-Caubet S, Jagasia R, Wagener J, Hofmann S, Trifunovic A, Hansson A, Chomyn  
893 A, Bauer MF, Attardi G, Larsson NG, Neupert W, Reichert AS. Proteolytic processing of OPA1  
894 links mitochondrial dysfunction to alterations in mitochondrial morphology. *J Biol Chem.*  
895 2006;281(49):37972-9. Epub 2006/09/28. doi: 10.1074/jbc.M606059200. PubMed PMID:  
896 17003040.
- 897 45. Rainbolt TK, Lebeau J, Puchades C, Wiseman RL. Reciprocal Degradation of YME1L and  
898 OMA1 Adapts Mitochondrial Proteolytic Activity during Stress. *Cell Rep.* 2016;14(9):2041-9.  
899 doi: 10.1016/j.celrep.2016.02.011. PubMed PMID: 26923599; PMCID: PMC4785047.
- 900 46. Ishihara N, Fujita Y, Oka T, Mihara K. Regulation of mitochondrial morphology through  
901 proteolytic cleavage of OPA1. *EMBO J.* 2006;25(13):2966-77. Epub 2006/06/17. doi:  
902 10.1038/sj.emboj.7601184. PubMed PMID: 16778770; PMCID: PMC1500981.
- 903 47. Baker MJ, Tatsuta T, Langer T. Quality control of mitochondrial proteostasis. *Cold Spring*  
904 *Harb Perspect Biol.* 2011;3(7). doi: 10.1101/cshperspect.a007559. PubMed PMID: 21628427;  
905 PMCID: PMC3119916.
- 906 48. Zhang D, Zhang Y, Ma J, Niu T, W. C, X. P, Zhia Y, Sun F. Cryo-EM structures reveal  
907 interactions of S-OPA1 with membrane and changes upon nucleotide binding. *bioRxiv.* 2019. doi:  
908 <https://doi.org/10.1101/528042>.
- 909 49. Ge Y, Siegel AP, Jordan R, Naumann CA. Ligand binding alters dimerization and  
910 sequestering of urokinase receptors in raft-mimicking lipid mixtures. *Biophys J.*  
911 2014;107(9):2101-11. Epub 2014/11/25. doi: 10.1016/j.bpj.2014.09.021. PubMed PMID:  
912 25418095; PMCID: PMC4223190.
- 913 50. Lewis RN, McElhaney RN. The physicochemical properties of cardiolipin bilayers and  
914 cardiolipin-containing lipid membranes. *Biochim Biophys Acta.* 2009;1788(10):2069-79. Epub  
915 2009/03/31. doi: 10.1016/j.bbamem.2009.03.014. PubMed PMID: 19328771.
- 916 51. Minner DE, Herring VL, Siegel AP, Kimble-Hill A, Johnson MA, Naumann CA. Iterative  
917 layer-by-layer assembly of polymer-tethered multi-bilayers using maleimide-thiol coupling

918 chemistry. *Soft Matter*. 2013;9(40):9643-50. Epub 2013/10/28. doi: 10.1039/c3sm51446c.  
919 PubMed PMID: 26029773.

920 52. Huang Y, Bharill S, Karandur D, Peterson SM, Marita M, Shi X, Kaliszewski MJ, Smith  
921 AW, Isacoff EY, Kuriyan J. Molecular basis for multimerization in the activation of the epidermal  
922 growth factor receptor. *Elife*. 2016;5. Epub 2016/03/29. doi: 10.7554/eLife.14107. PubMed  
923 PMID: 27017828; PMCID: PMC4902571.

924 53. Comar WD, Schubert SM, Jastrzebska B, Palczewski K, Smith AW. Time-resolved  
925 fluorescence spectroscopy measures clustering and mobility of a G protein-coupled receptor opsin  
926 in live cell membranes. *J Am Chem Soc*. 2014;136(23):8342-9. doi: 10.1021/ja501948w. PubMed  
927 PMID: 24831851; PMCID: PMC4063175.

928 54. Jaqaman K, Loerke D, Mettlen M, Kuwata H, Grinstein S, Schmid SL, Danuser G. Robust  
929 single-particle tracking in live-cell time-lapse sequences. *Nat Methods*. 2008;5(8):695-702. Epub  
930 2008/07/22. doi: 10.1038/nmeth.1237. PubMed PMID: 18641657; PMCID: PMC2747604.  
931



# Figure 1

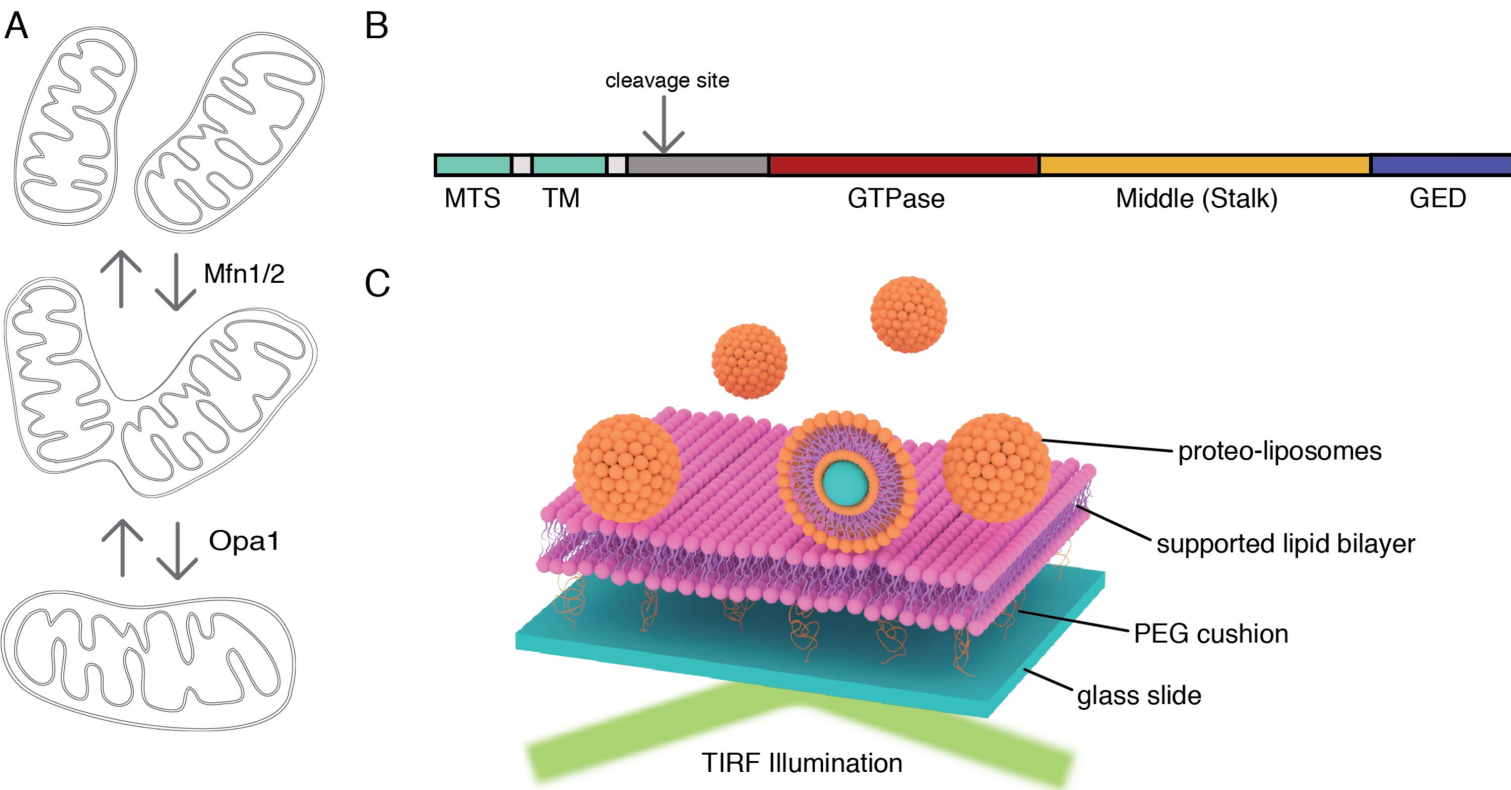

**D**

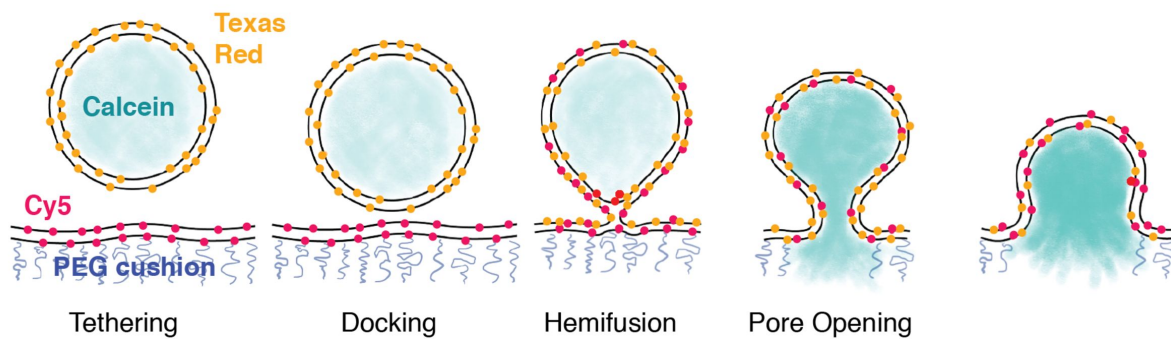

# Figure 2

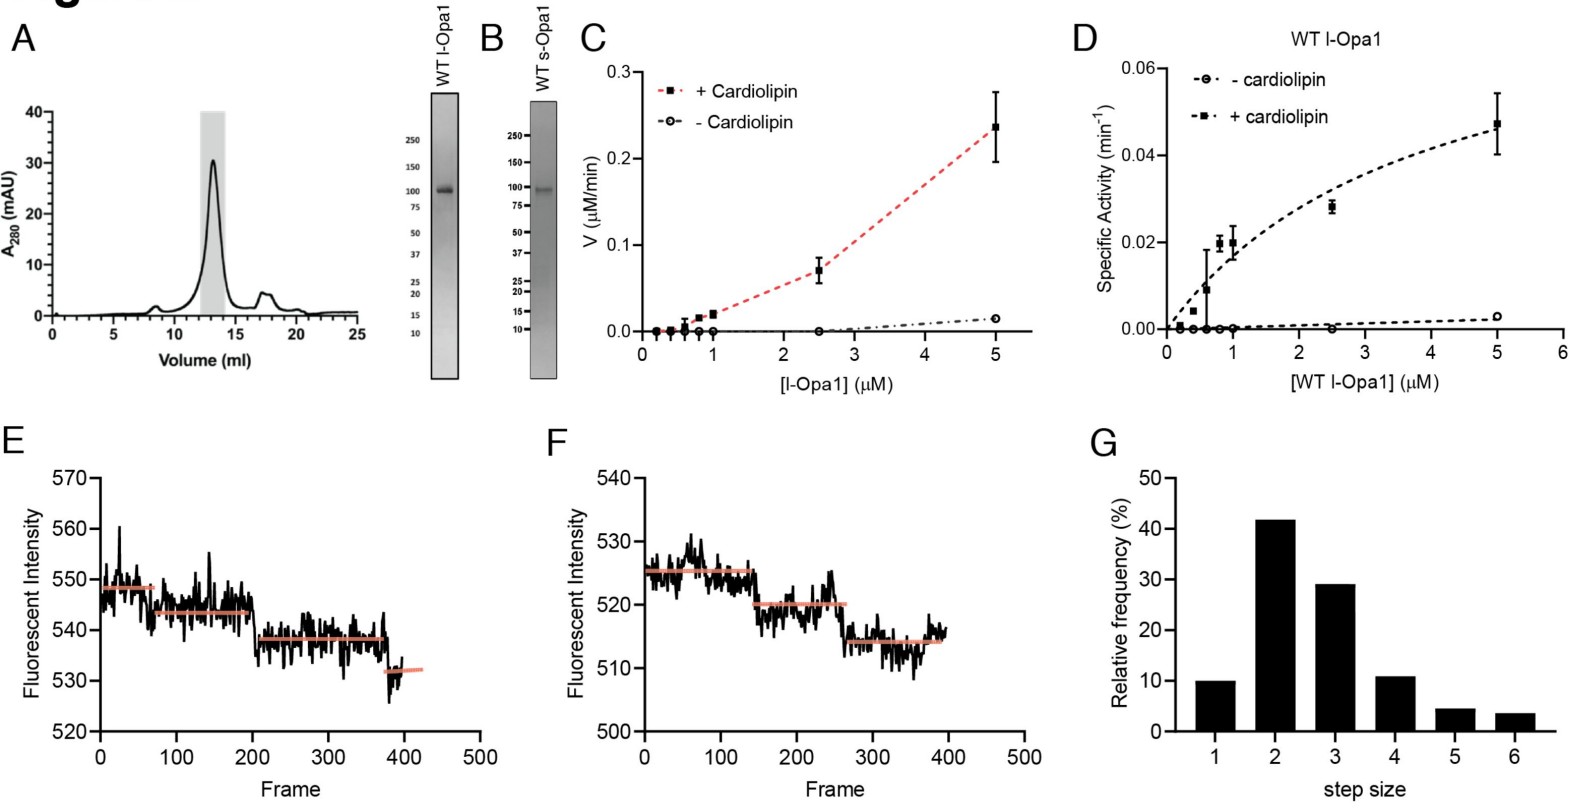

# Figure 2-figure supplement 1

A

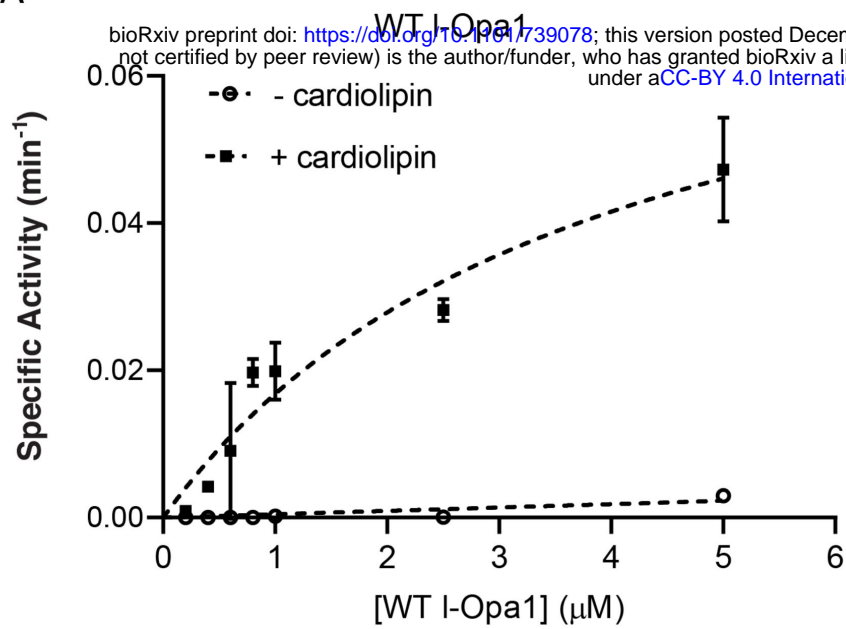

B

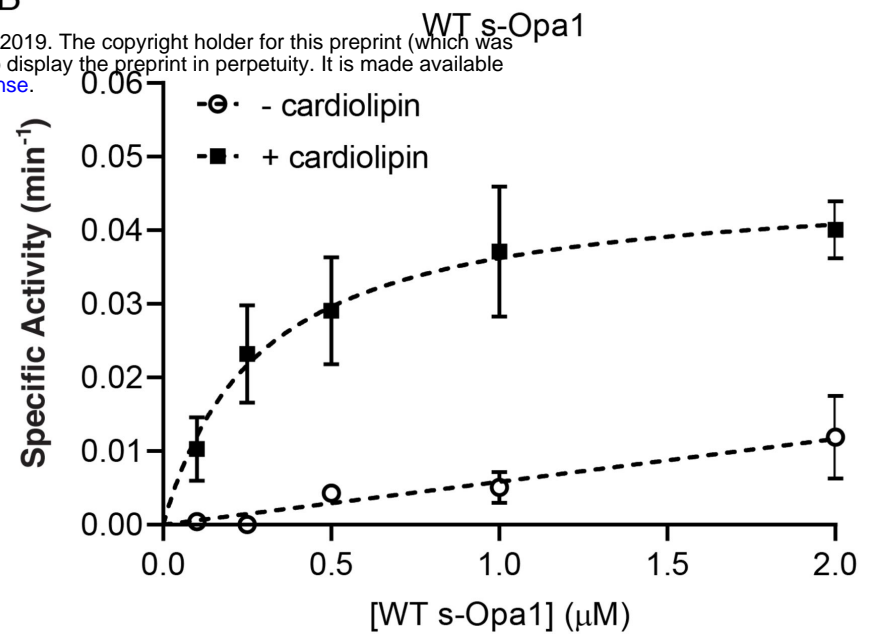

C

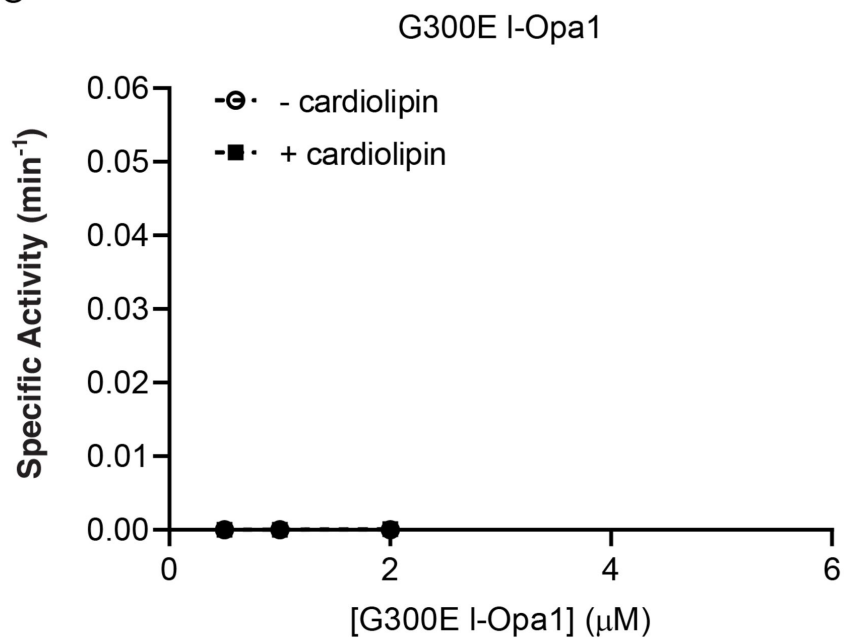

D

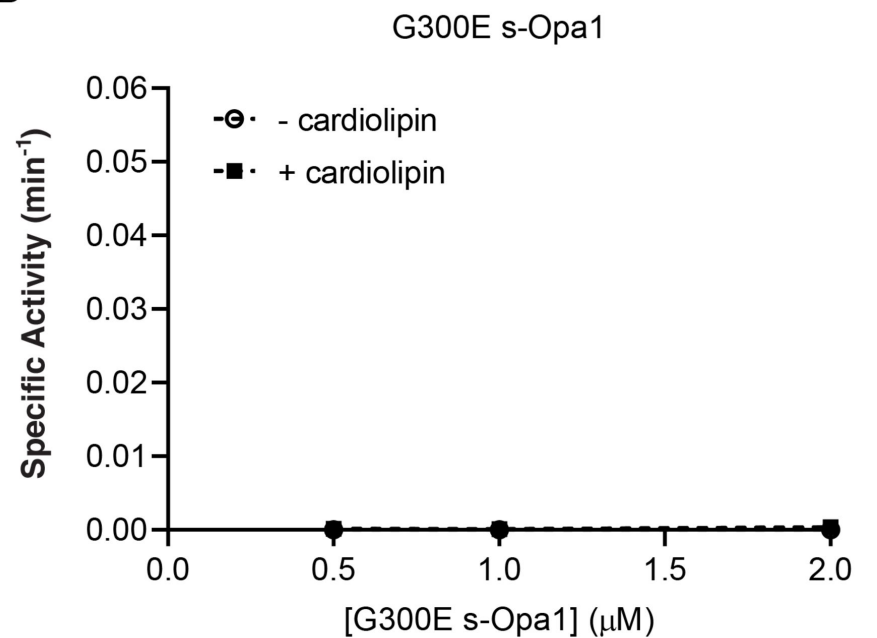

E

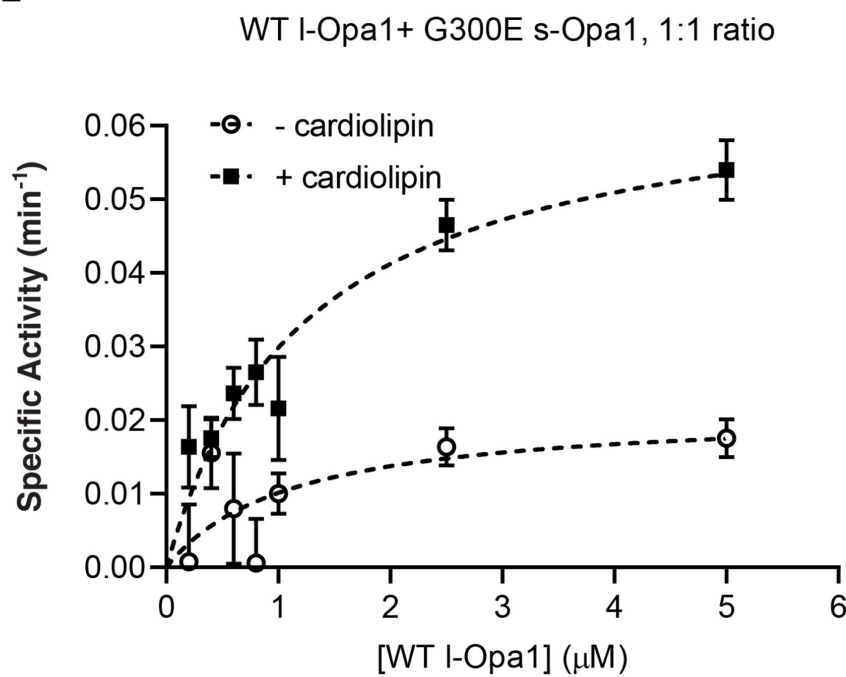

F

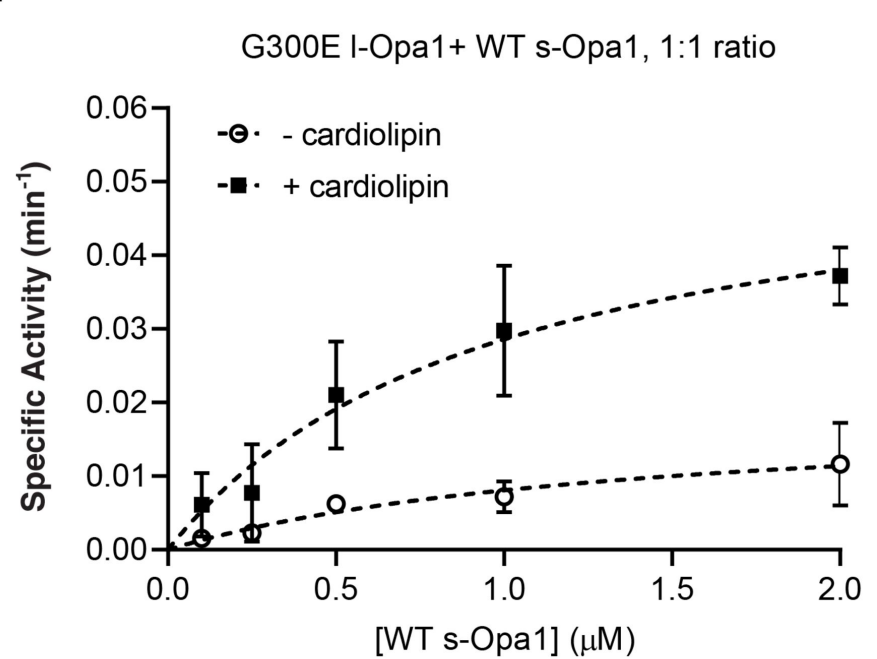

# Figure 2-figure supplement 2

**A**

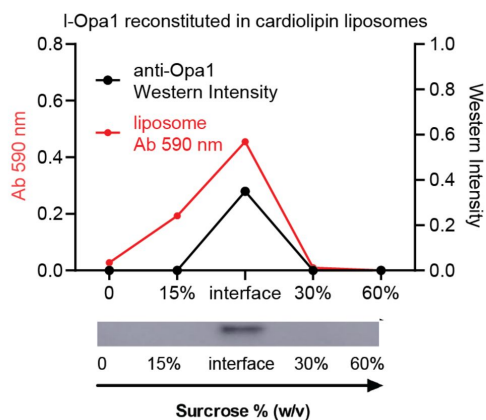

**B**

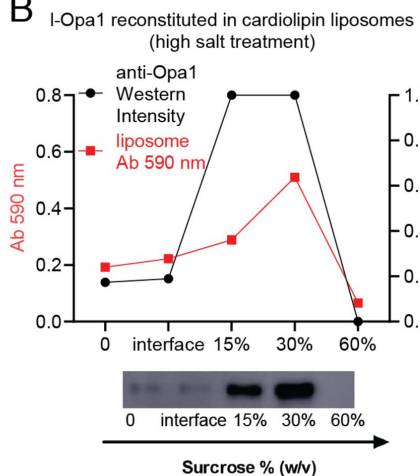

**C**

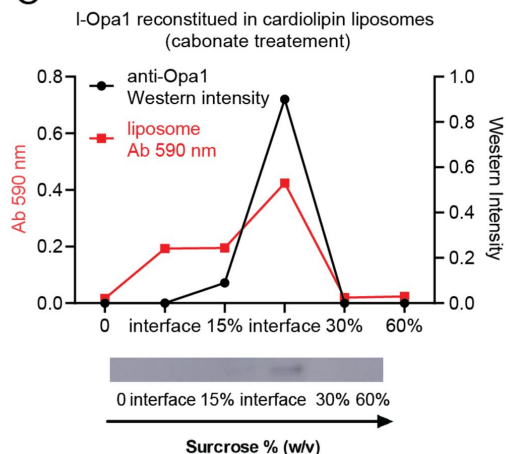

**D**

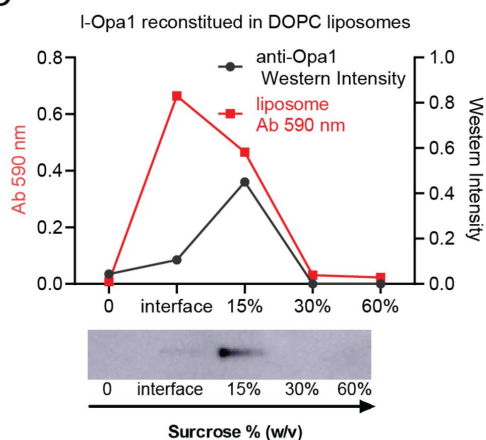

**E**

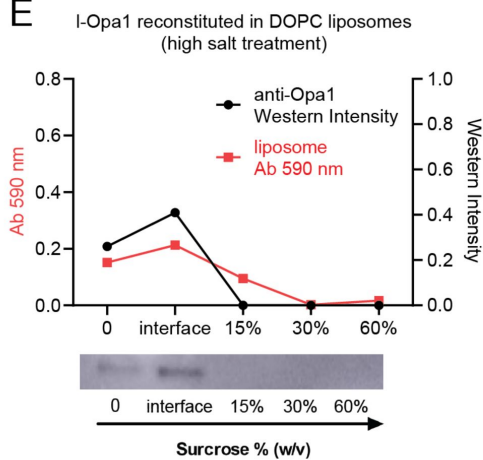

**F**

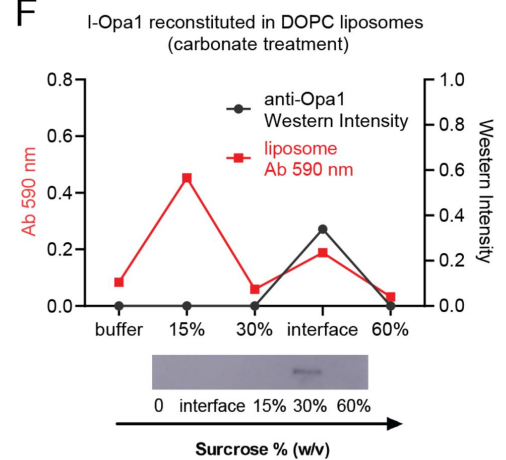

**G**

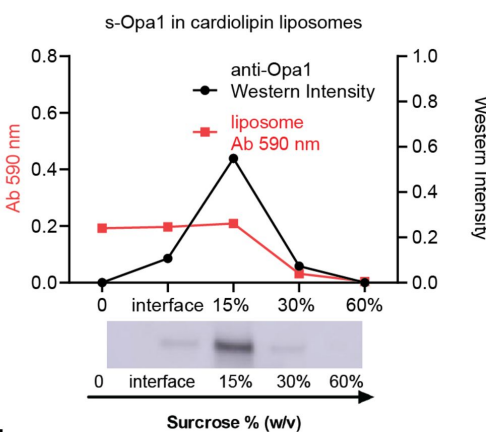

**H**

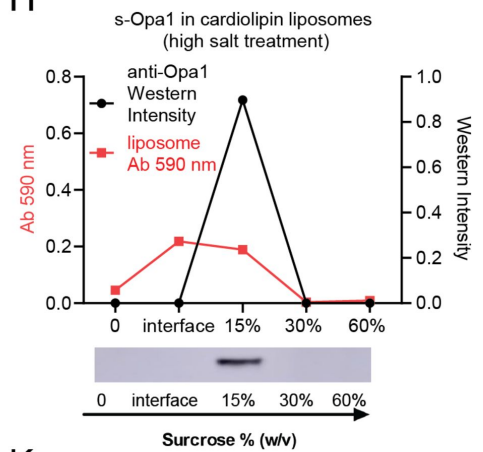

**I**

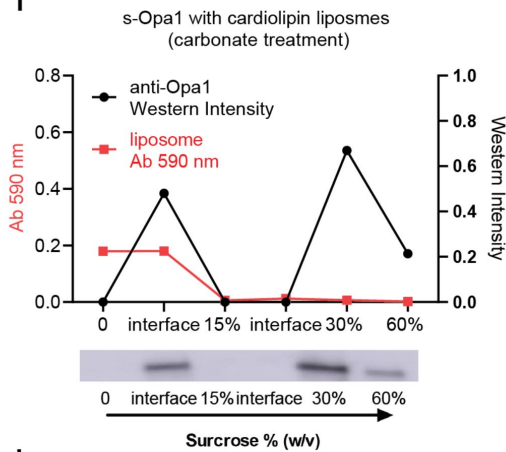

**J**

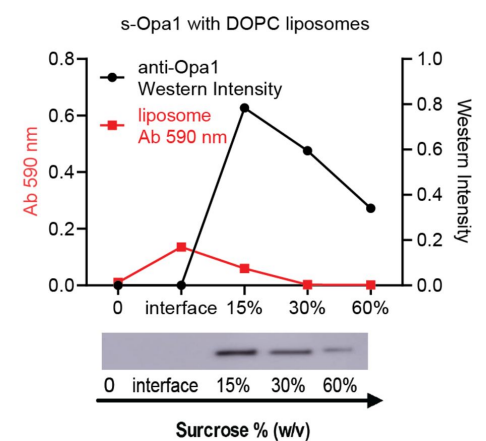

**K**

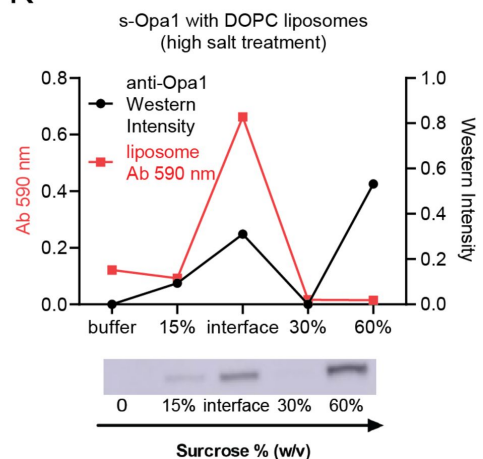

**L**

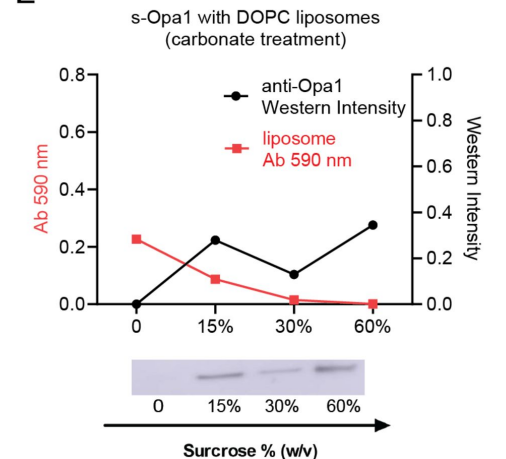

Figure 2-figure supplement 3

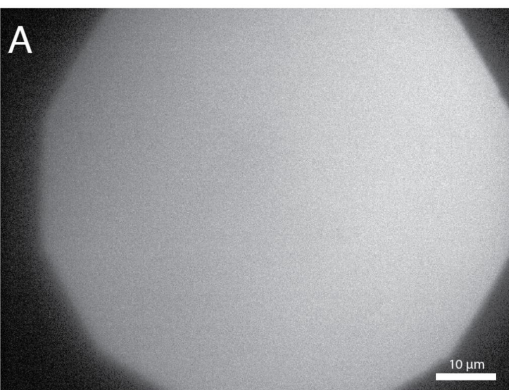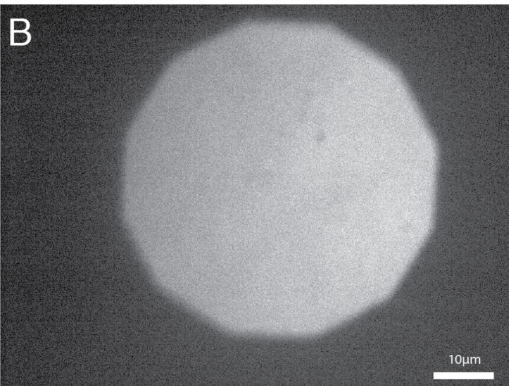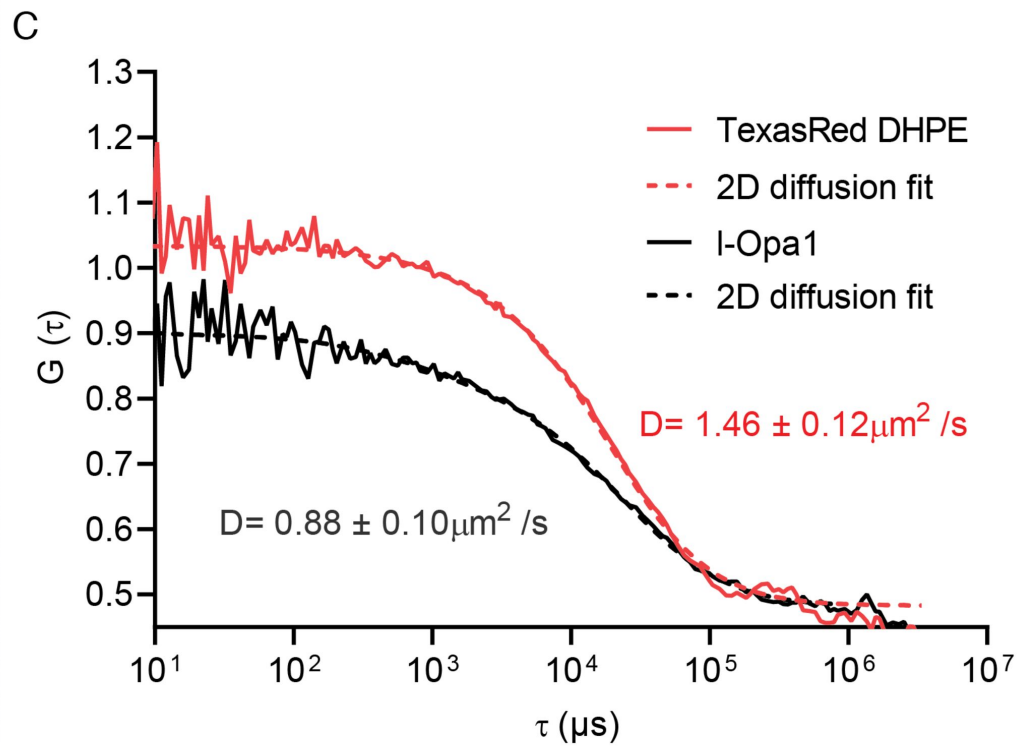



# Figure 2-figure supplement 4

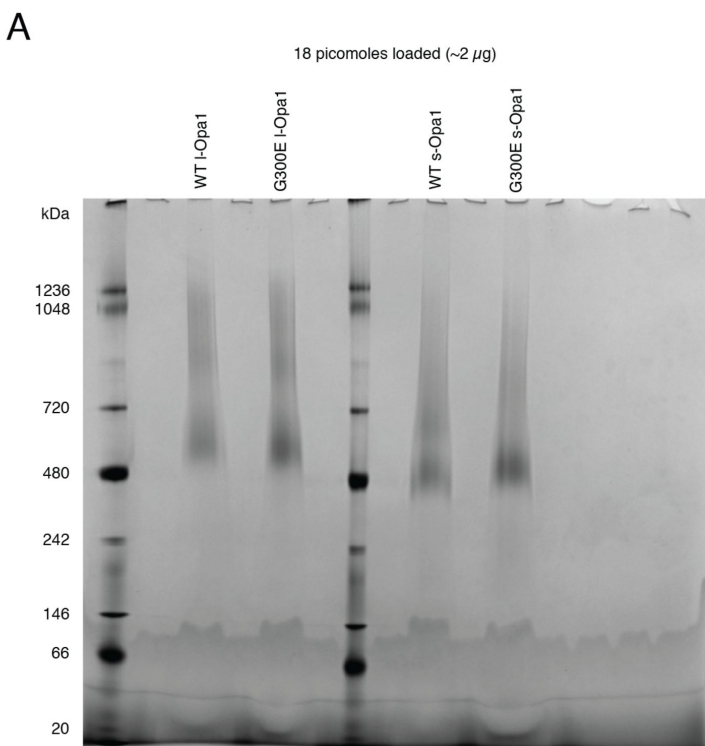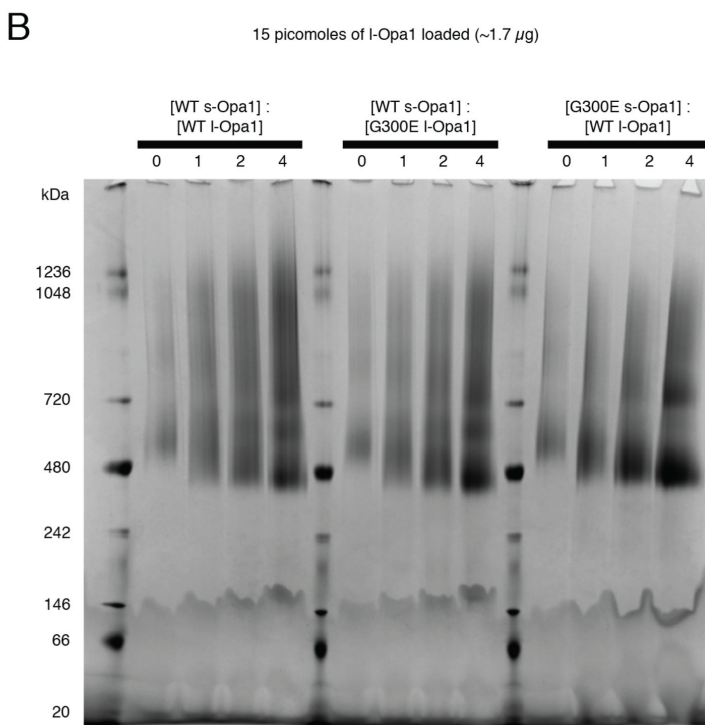

# Figure 2--figure supplement 5

A

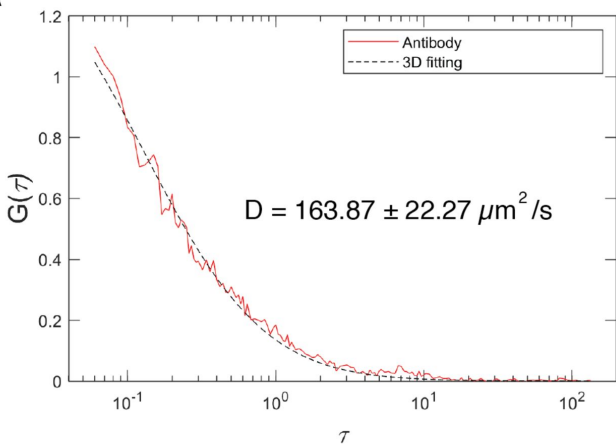

B

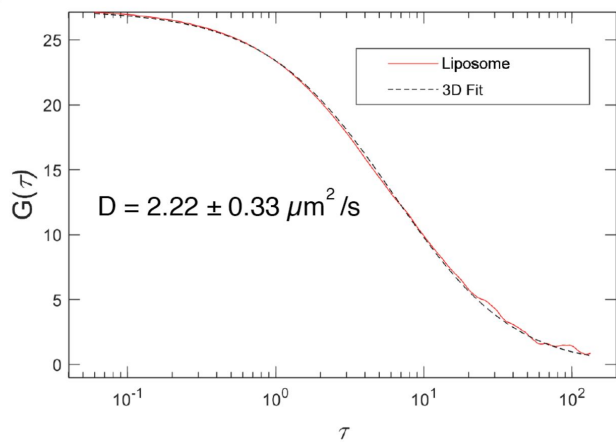

C

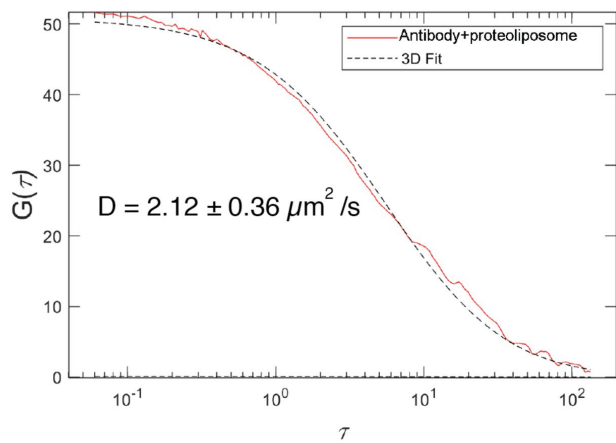

# Figure 3

A

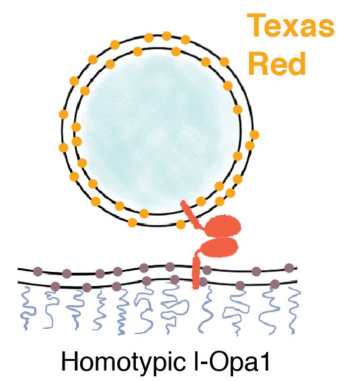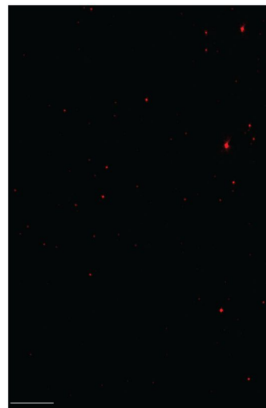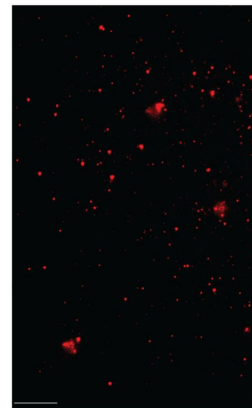

apo

+GTP

B

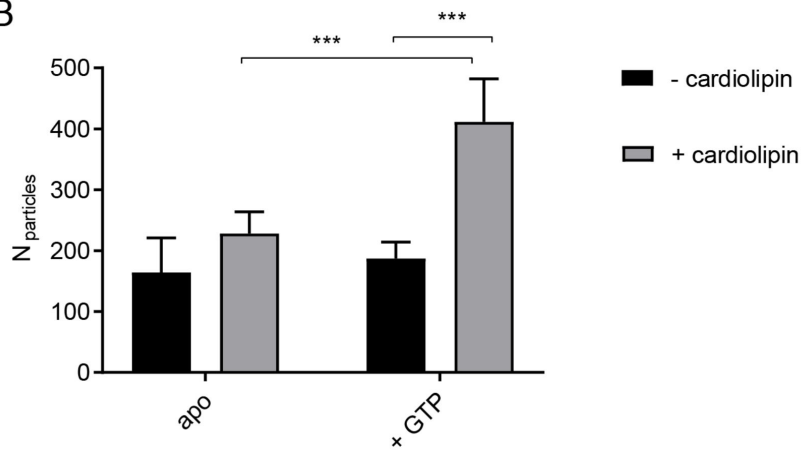

C

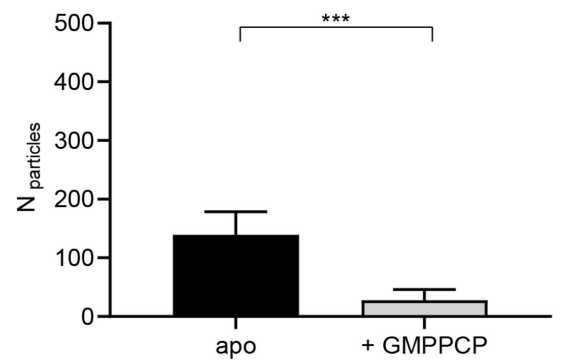

D

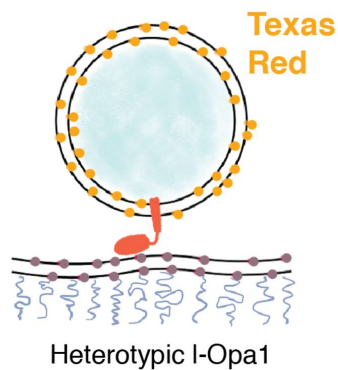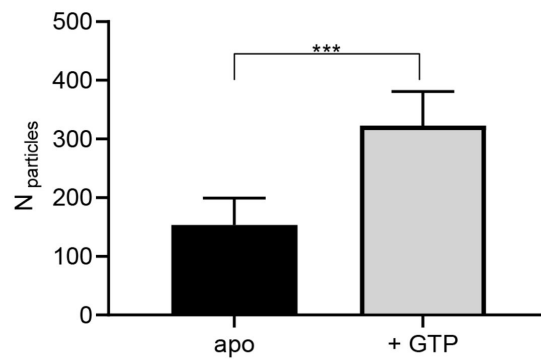

E

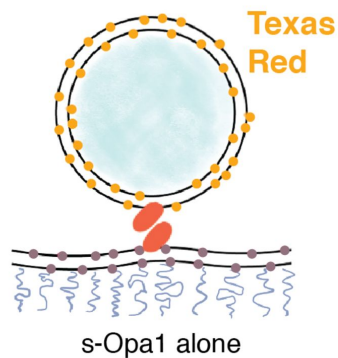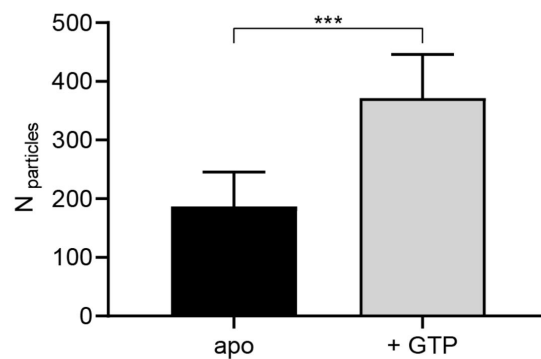



# Figure 3-figure supplement 1

A

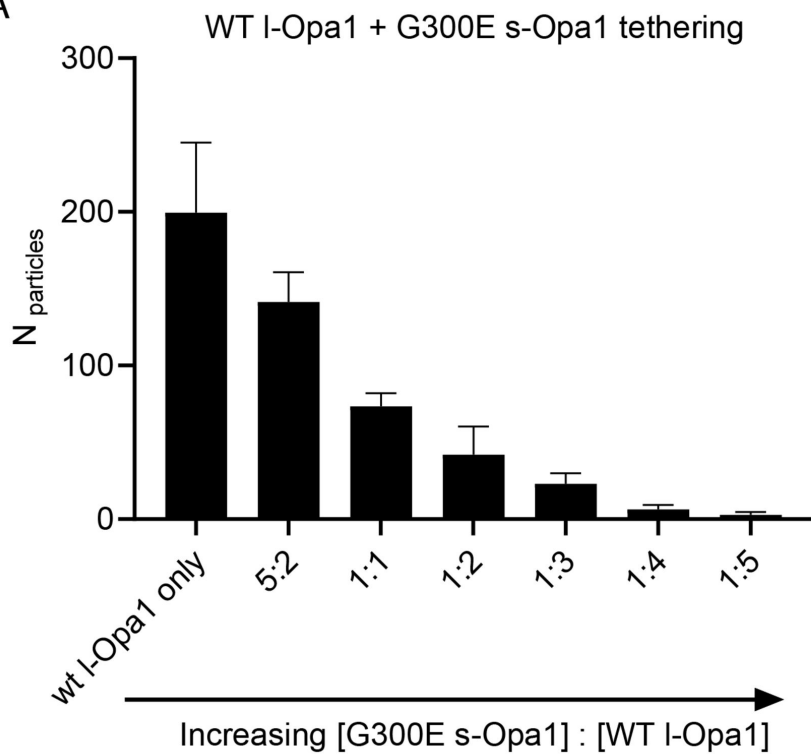

B

G300E I-Opa1 and  
G300E I-Opa1 + G300E s-Opa1  
liposome tethering

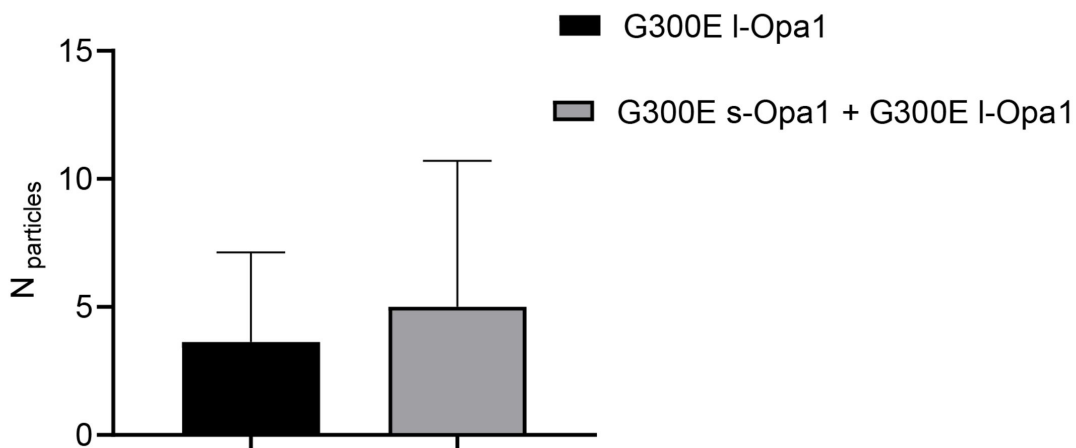

# Figure 3-figure supplement 2

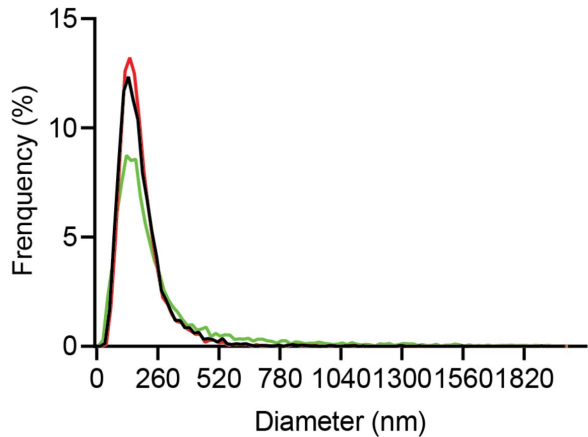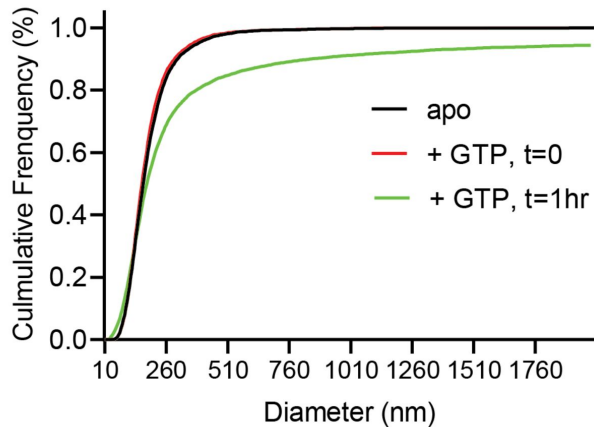

# Figure 4

A

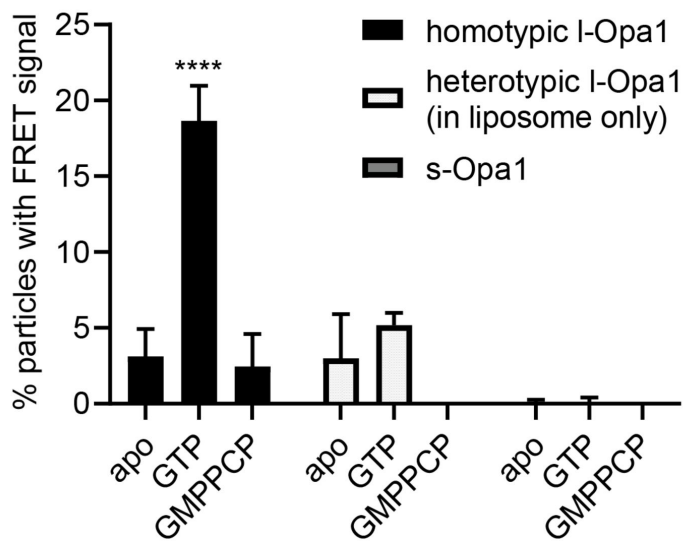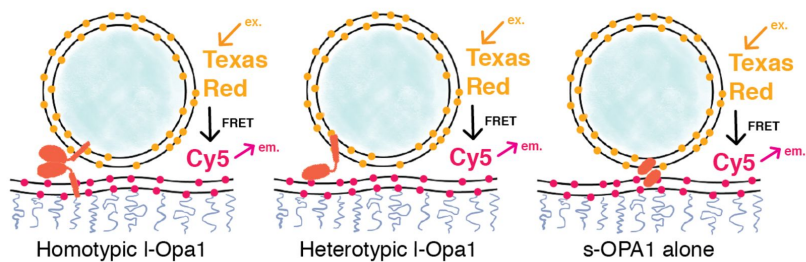

B

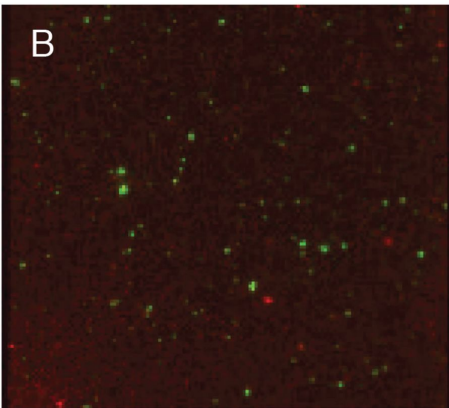

C

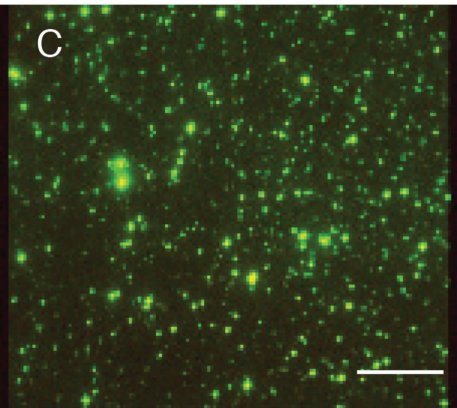

# Figure 4-figure supplement 1

A

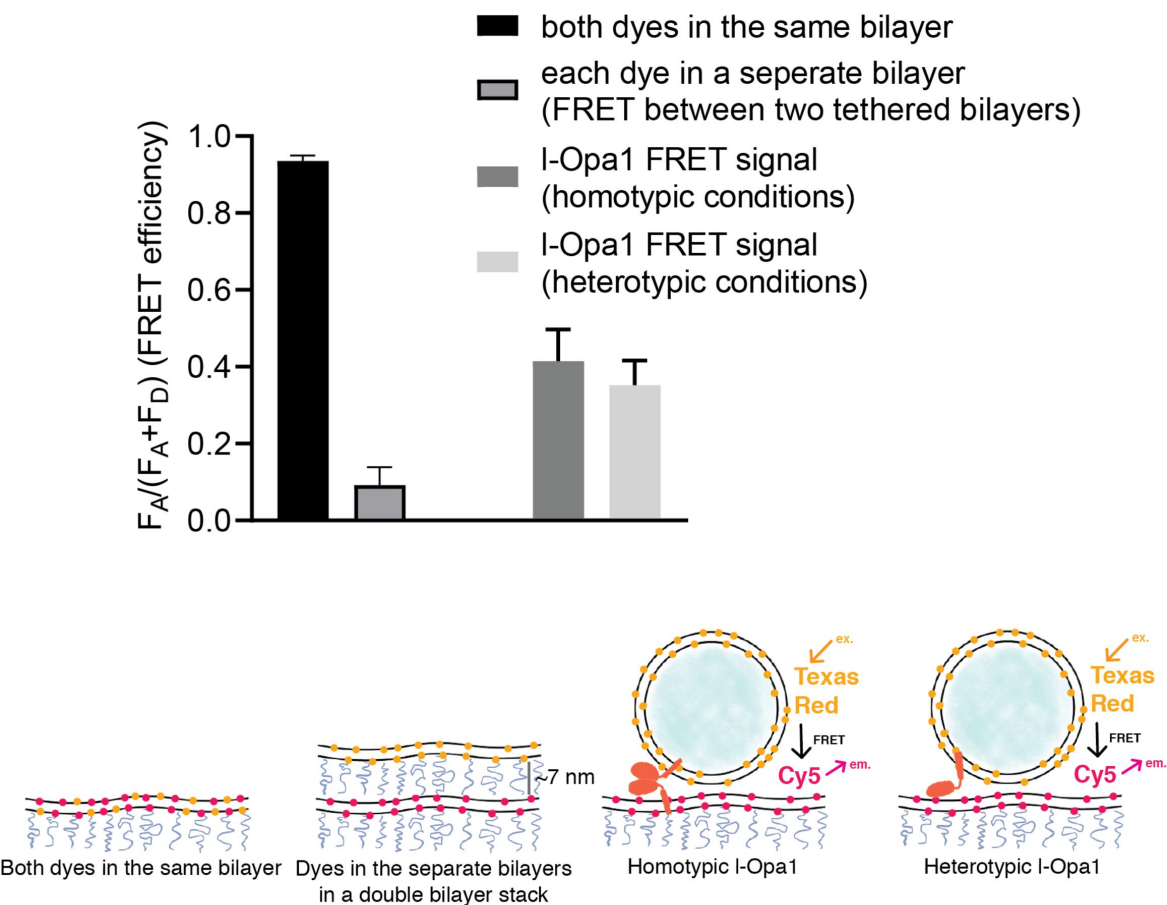

B

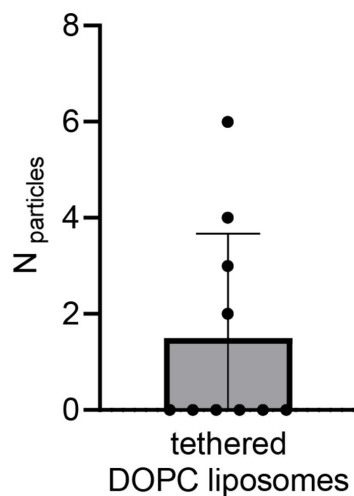

**Figure 5**

**A**

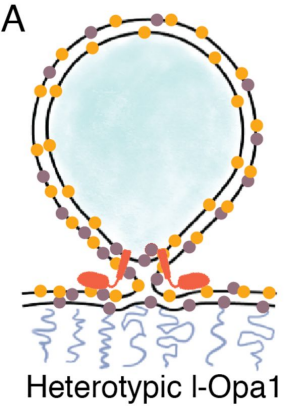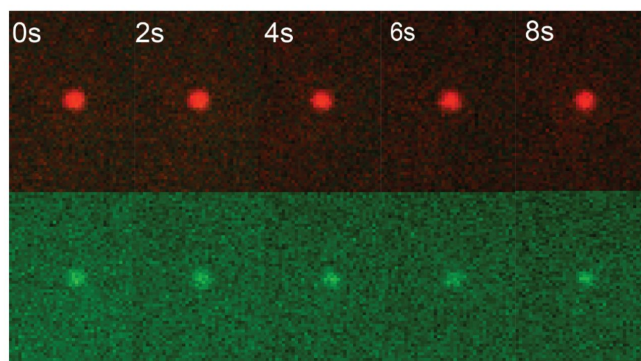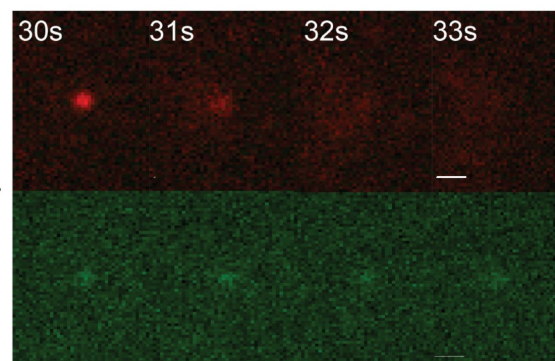

**B**

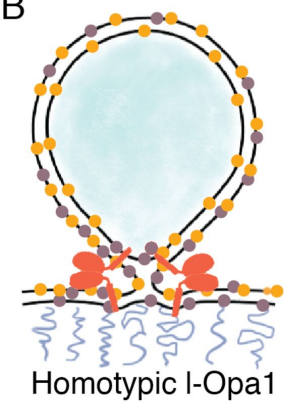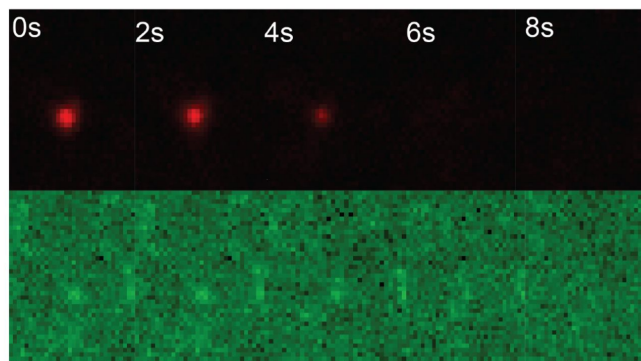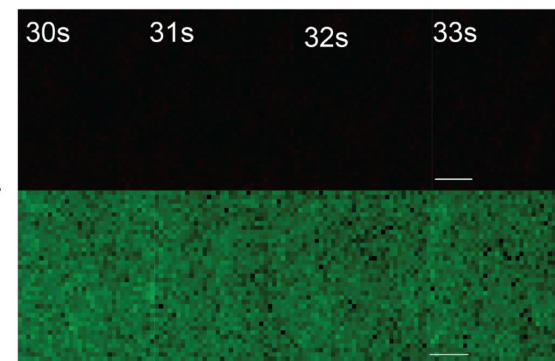

**C**

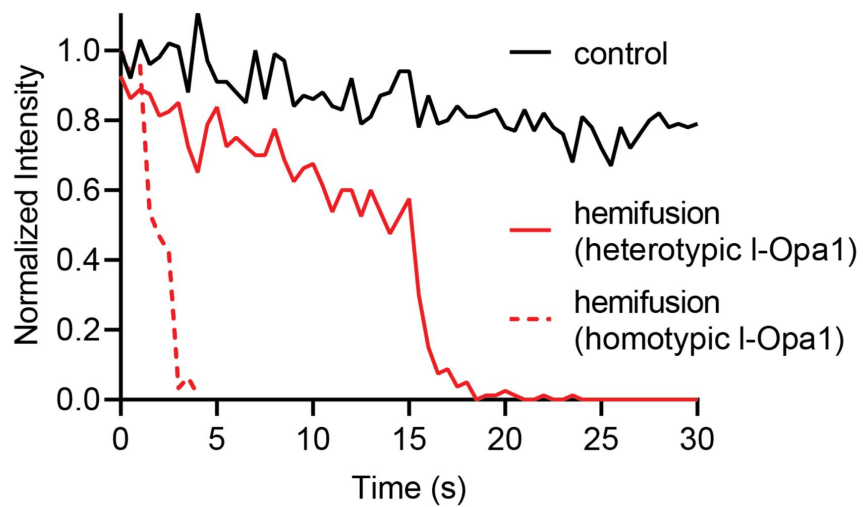

# Figure 5-figure supplement 1

## A. Additional examples of homotypic hemifusion:

i.

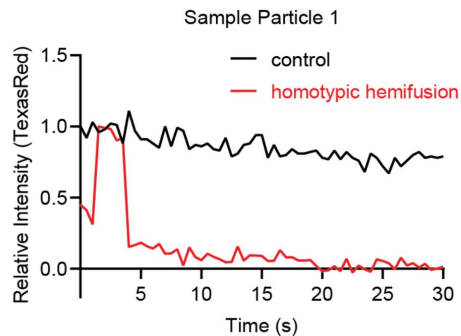

ii.

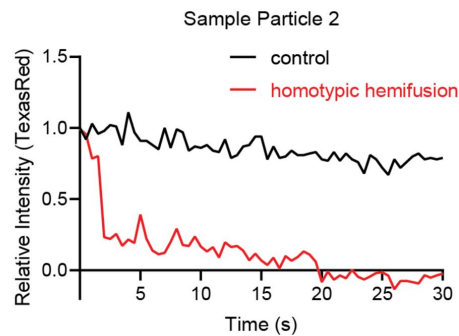

iii.

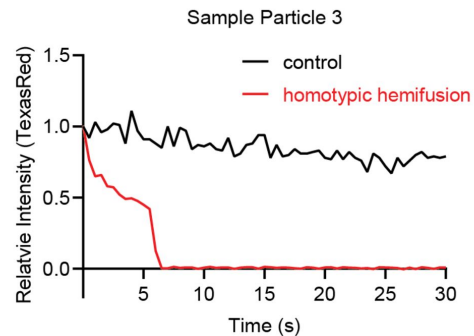

## B. Additional examples of heterotypic hemifusion

i.

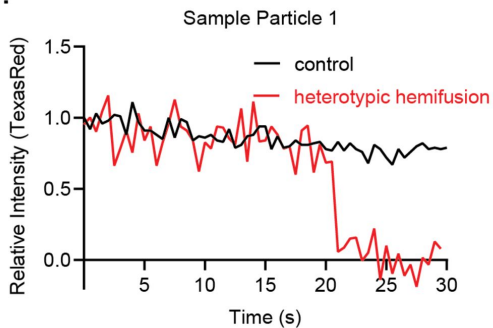

ii.

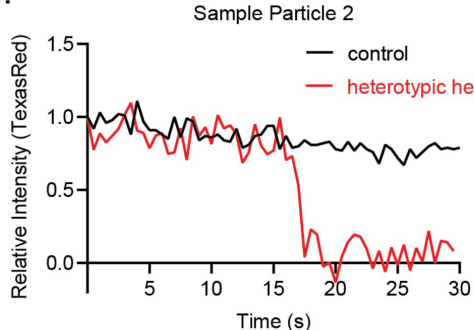

iii.

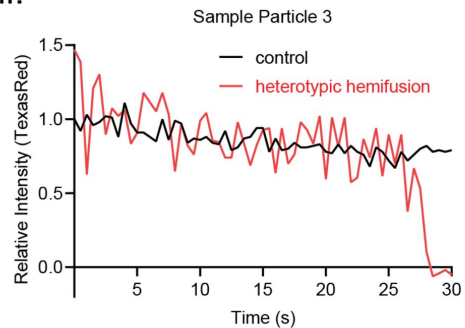



# Figure 6

**A**

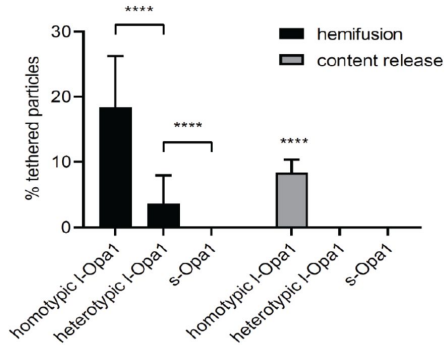

**B**

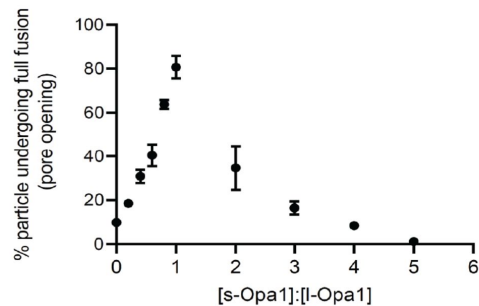

**C**

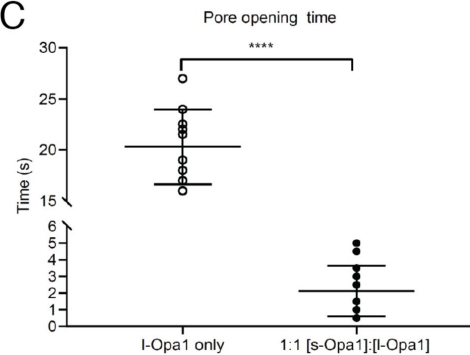

**D**

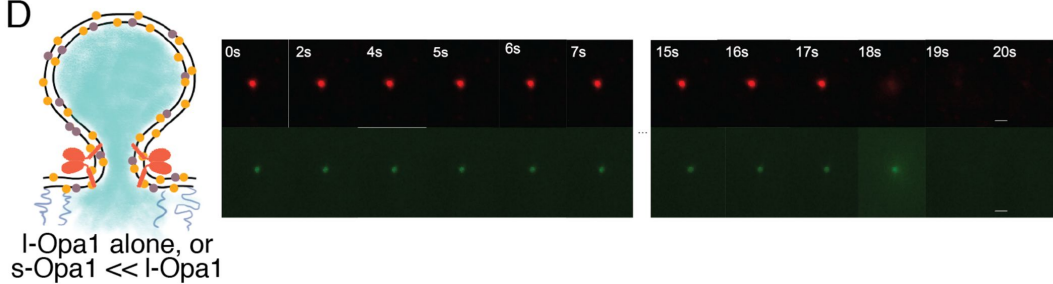

**E**

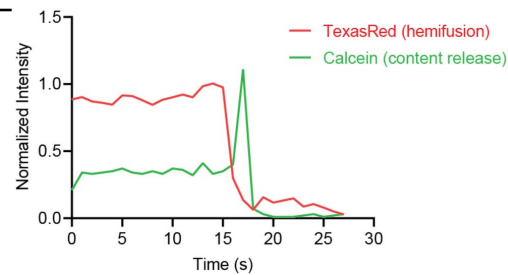

**F**

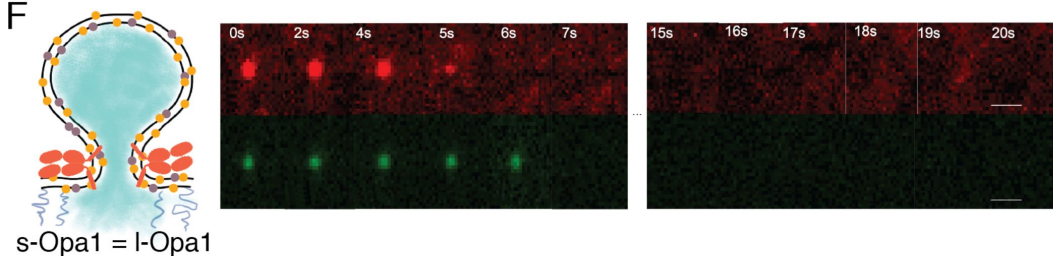

**G**

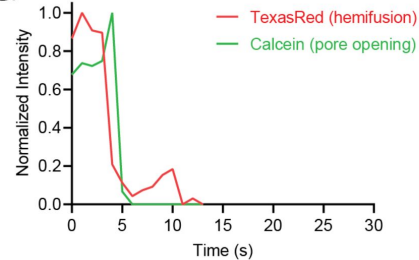

# Figure 6-figure supplement 1

## A. Additional examples of I-Opa1 (on both bilayers) hemifusion and pore opening

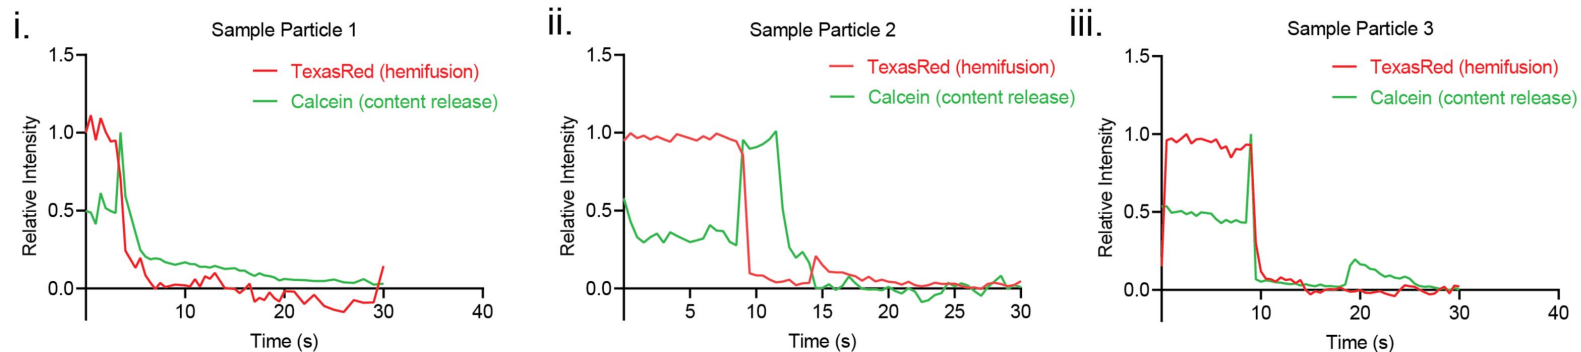

## B. Additional examples of I-Opa1 (on both bilayers) + s-Opa1 hemifusion and pore opening

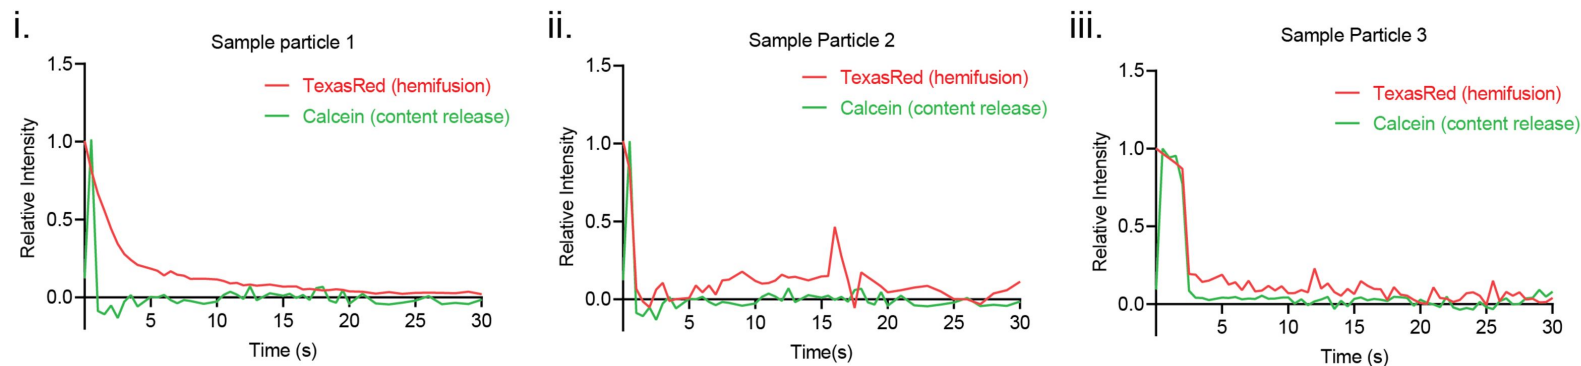



# Figure 7

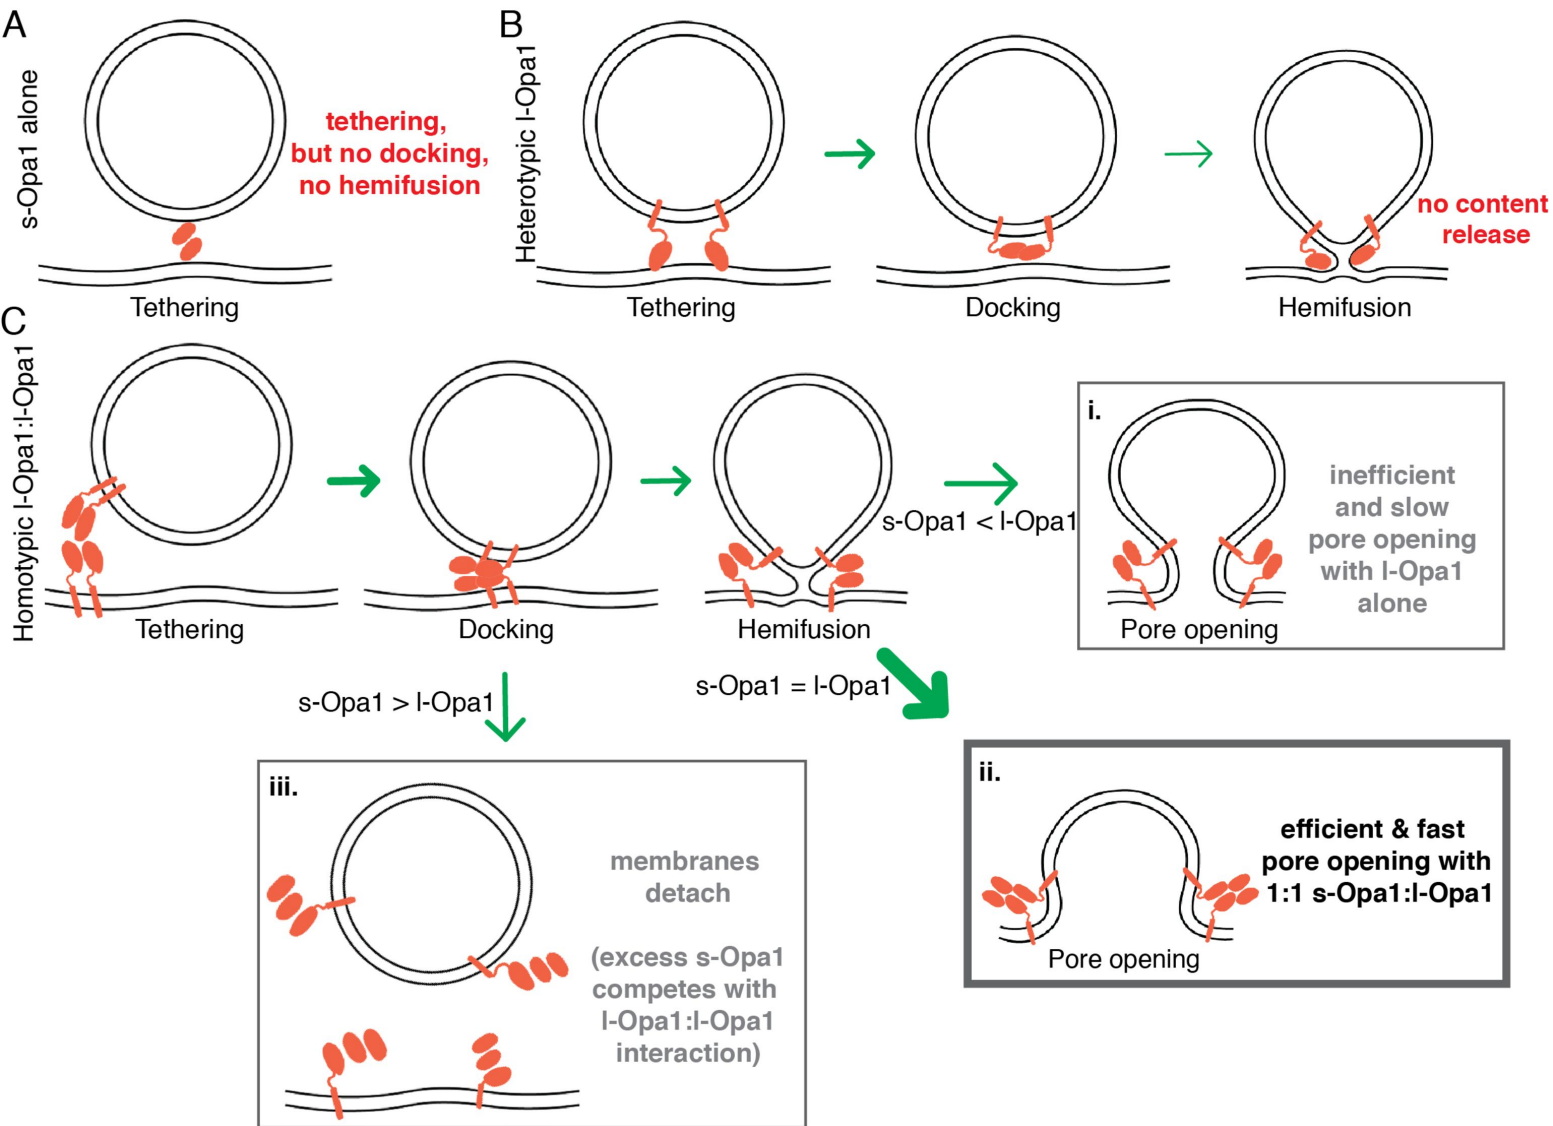

Source: https://www.biorxiv.org/content/10.1101/739078v3.full.pdf
